# Supplementary material for: 1D Zn(ii)/2D Cu(i) halogen pyridyl coordination polymers. Band gap engineering by DFT for predicting more efficient photocatalysts in water treatment
Source: Royal Society of Chemistry journal article supplement (doi:10.1039/d4cy00969j), 2024-01-01
Supplement: d4cy00969j1.pdf [file d4cy00969j1.pdf]

## Supporting Information.

# 1D Zn(II)/2D Cu(I) halogen pyridyl coordination polymers. Band gap engineering by DFT for predicting more efficient photocatalysts in water treatment.

Andrea García-Hernán<sup>α</sup>, Fernando Aguilar-Galindo<sup>γ,δ</sup>, Oscar Castillo<sup>χ</sup>, Pilar Amo-Ochoa<sup>α,δ\*</sup>

<sup>α</sup>*Dpto. de Química Inorgánica. Universidad Autónoma de Madrid, 28049 Madrid, Spain.*

<sup>γ</sup>*Dpto. Química Universidad Autónoma de Madrid, 28049 Madrid, Spain*

<sup>δ</sup>*Institute for Advanced Research in Chemical Sciences (IAdChem). Universidad Autónoma de Madrid, 28049 Madrid, Spain*

<sup>χ</sup>*Department of Organic and Inorganic Chemistry, University of the Basque Country UPV/EHU, 48080 Bilbao, Spain*

E-mail: [pilar.amo@uam.es](mailto:pilar.amo@uam.es)

1. **Experimental details**
  - 1.1. . **Synthesis and characterization of  $[\text{ZnX}_2(\text{L})]_n$  compounds (L=BPE, and BPEE, X= Cl, Br, and I)**
  - 1.2. **Synthesis and characterization of  $[\text{Cu}_2\text{X}_2(\text{BPEE})]_n$  compounds (X=Cl, Br, and I)**
2. **DFT calculations to explore  $[\text{ZnX}_2(\text{BPE})]_n$  (X=Cl (1a), Br (2a), and I (3a)) theoretical band gaps and correlation with the experimental ones**
3. **Calculation of Atomic Economy (AE) and E-factor in  $[\text{ZnX}_2(\text{BPE})]_n$ ,  $[\text{ZnX}_2(\text{BPEE})]_n$  and  $[\text{Cu}_2\text{X}_2(\text{BPEE})]_n$  (X=Cl, Br, and I) compounds using the optimizing methodologies employing environmentally friendly procedures**
4. **DFT calculations to explore  $[\text{ZnX}_2(\text{BPEE})]_n$  (X=Cl (1b), Br (2b), and I (3b)) theoretical band gaps and correlation with the experimental ones**
5. **Study of the particle size of  $[\text{ZnX}_2(\text{BPEE})]_n$  (X=Cl (1b), Br (2b), and I (3b)) compounds**
6. **Crystallographic data and structure analysis**
7. **Analysis of the coordination bonds distances distribution**
8. **Water and thermal stability of  $[\text{ZnX}_2(\text{BPEE})]_n$**
9. **DFT calculations to explore 2D  $[\text{Cu}_2\text{X}_2(\text{BPEE})]_n$  (X= Cl (4b), Br (5b), I (6b)) theoretical band gaps and correlation with the experimental ones**
10. **Study of the particle size of  $[\text{Cu}_2\text{X}_2(\text{BPEE})]_n$**
11. **Water and thermal stability of  $[\text{Cu}_2\text{X}_2(\text{BPEE})]_n$  (X=Cl (4b), Br (5b), and I (6b)) compounds**
12. **Study of the photocatalytic efficiency of  $[\text{Cu}_2\text{X}_2(\text{BPEE})]_n$  in the degradation of Methyl blue (MB), Methyl orange (MO), and Tartrazine (Trz)**
13. **Study of the mechanism of photocatalysis via ROS species traps in CPs**

## 1. Experimental details

### 1.1 Synthesis and characterization of $[\text{ZnX}_2(\text{L})]_n$ compounds (L=BPE, and BPEE, X= Cl, Br, and I)

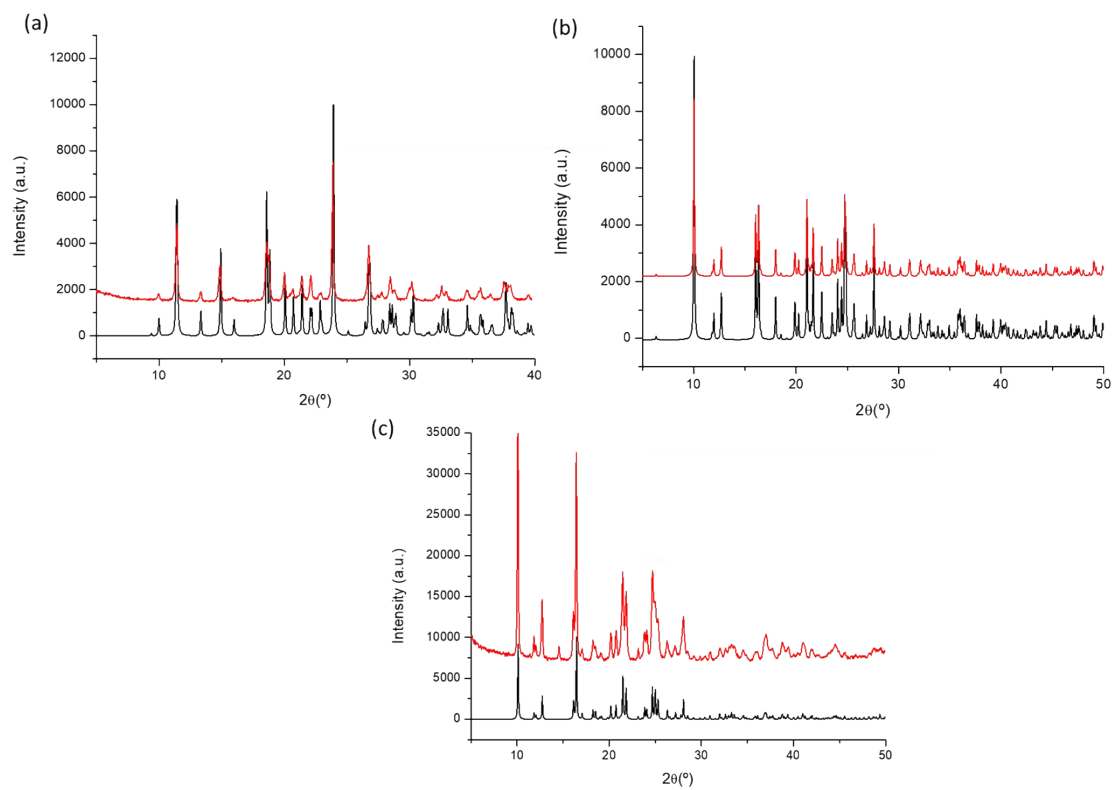

**Figure S1:** P-XRD of compounds: (a) **3a**, b) **2a** and c) **1a**. P-XRD simulated (black) and experimental (red).

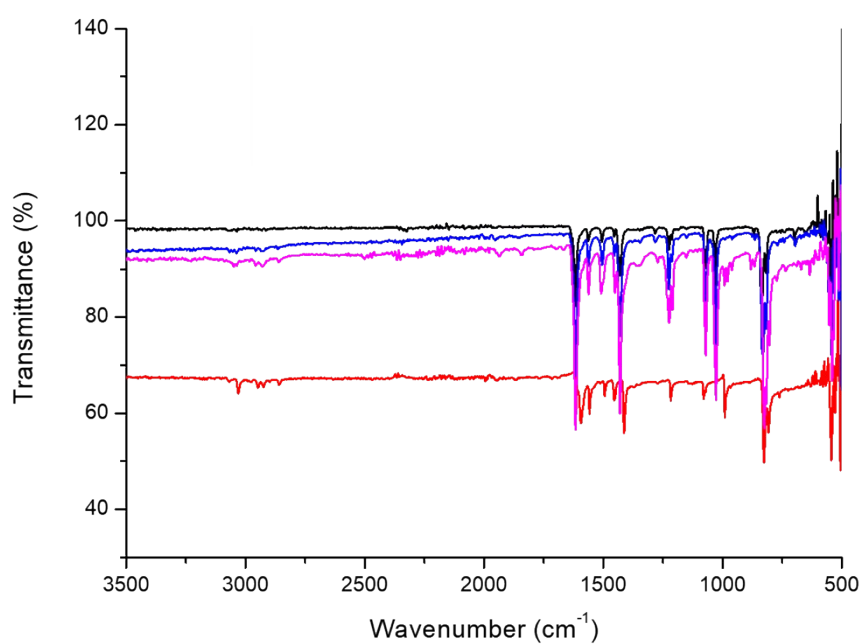

**Figure S2:** Infrared spectrum of compounds: **3a**, pink; **2a**, blue; **1a**, black; and the BPE ligand, red.

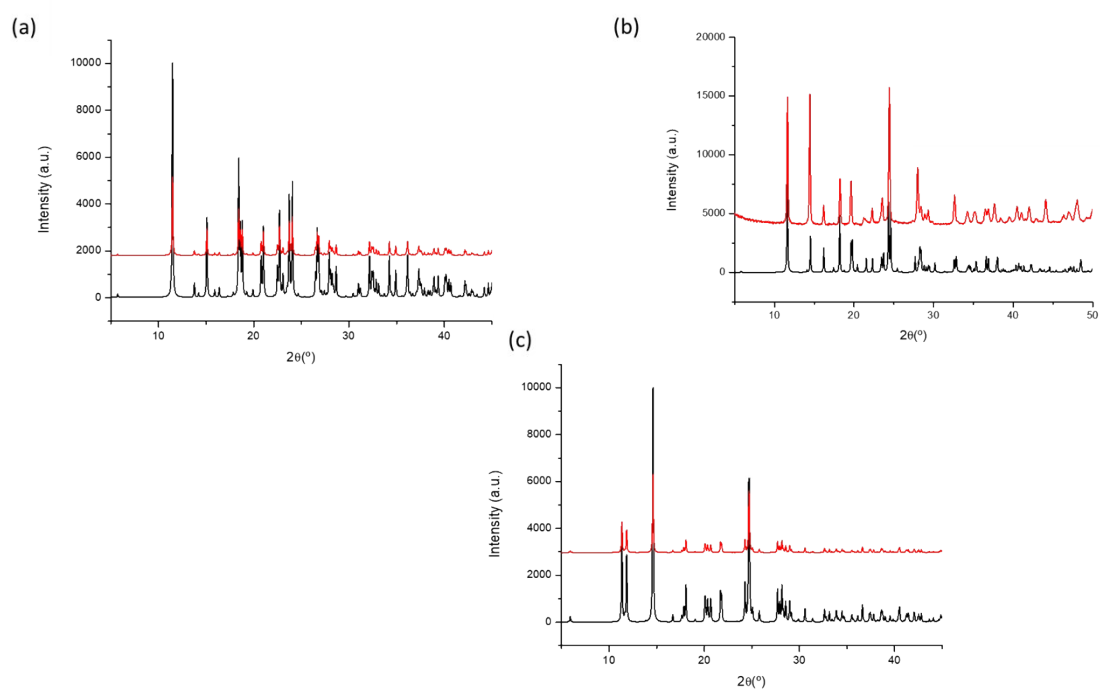

**Figure S3:** P-XRD of compounds (a) **3b**, (b) **2b** and (c) **1b**. P-XRD Simulated (black) and experimental (red).

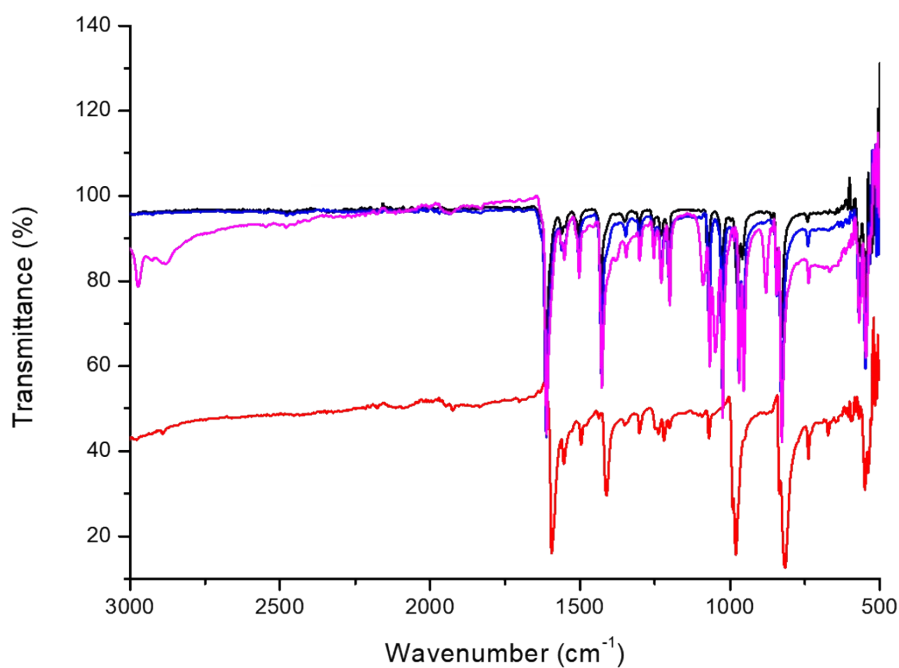

**Figure S4:** Infrared spectrum of compounds **3b**, pink; **2b**, blue; **1b**, black, and BPEE ligand, red.

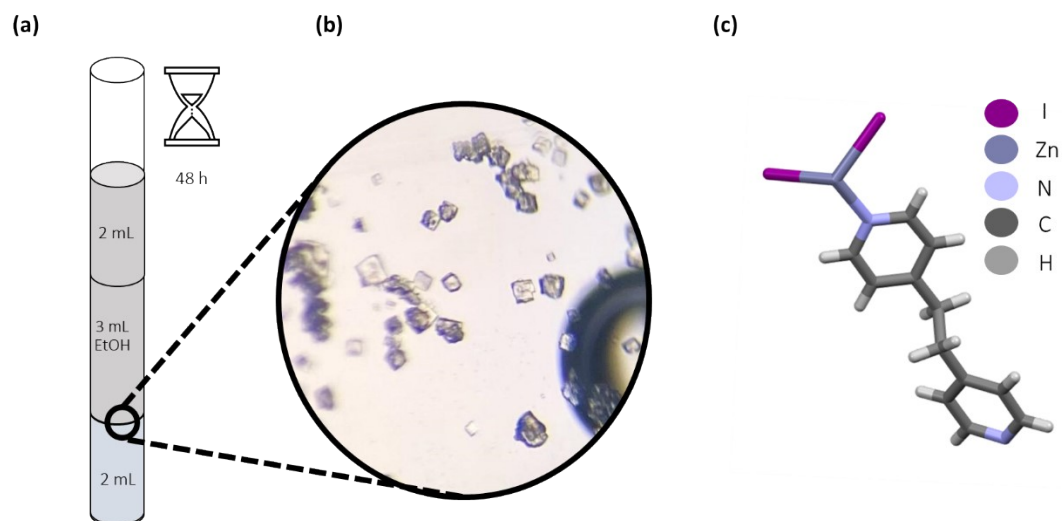

**Figure S5.** Crystallization scheme of **3a**: a) The two reagents, BPE in EtOH (gray) and  $\text{ZnI}_2$  in water (blue), overlap by dropwise addition inside a test tube where there is an EtOH intermedium to slow down the reaction between the reactants, b) Optical image of single crystals of **3a** and c) asymmetric unit of **3a**.

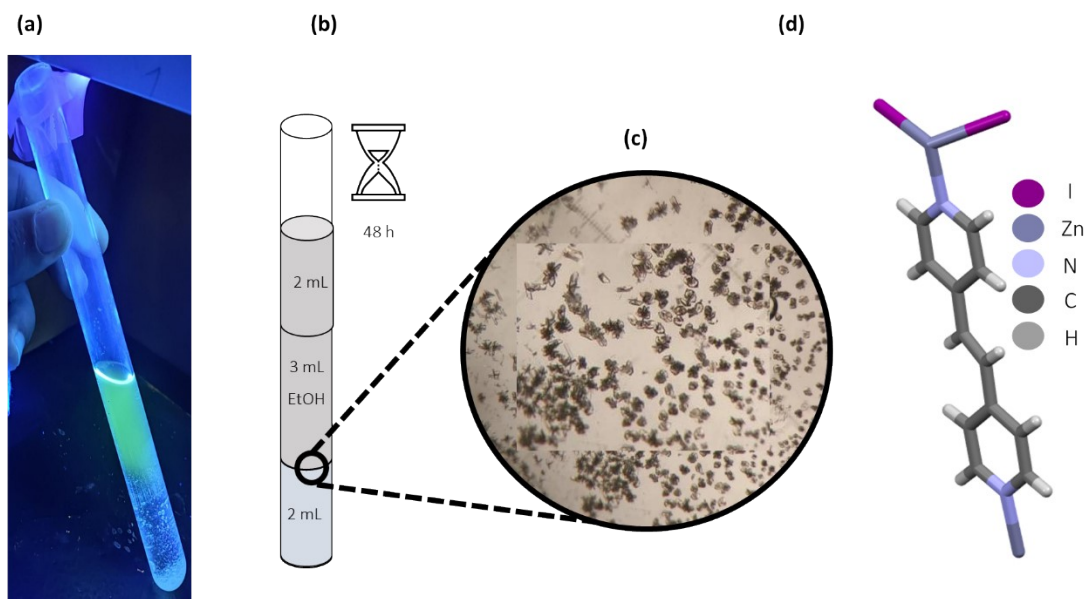

**Figure S6.** a) test tube under UV light ( $\lambda=365$  nm); b) crystallization scheme of **3b**. The two reagents, BPEE in EtOH (gray) and  $\text{ZnI}_2$  in water (blue), overlap by dropwise addition inside a test tube where there is an EtOH intermedium to slow down the reaction between the reactants, c) Optical image of single crystals of **3b** and d) asymmetric unit of **3b**.

1.2. Synthesis and characterization of  $[\text{Cu}_2\text{X}_2(\text{BPEE})]_n$  compounds (X=Cl, Br, and I).

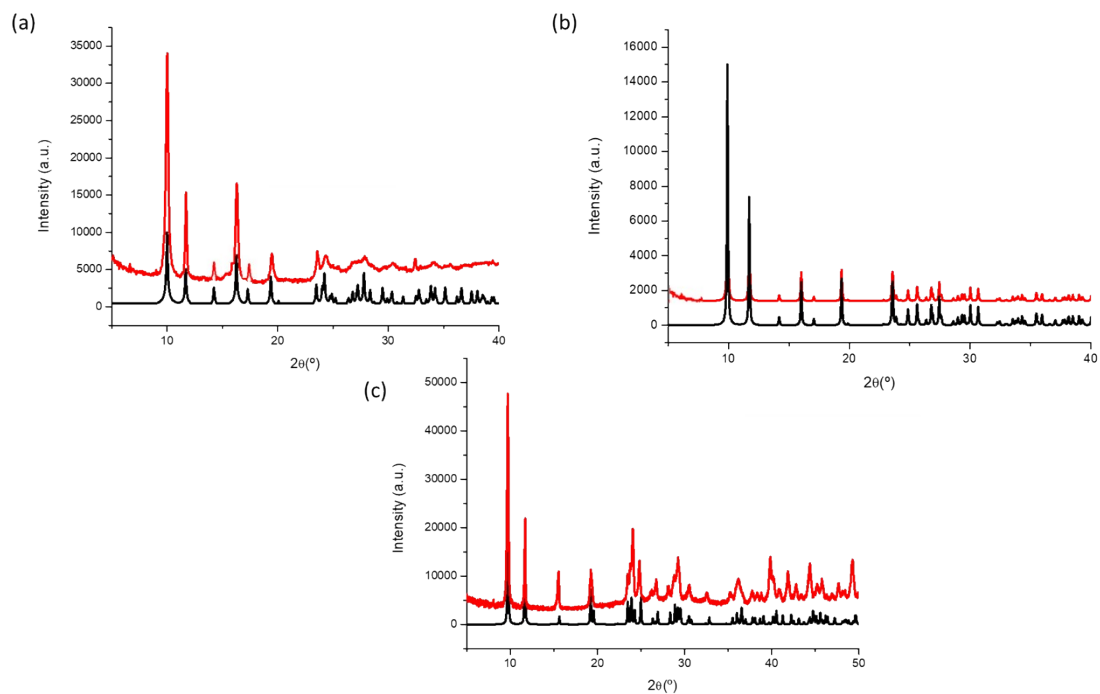

**Figure S7:** P-XRD of compounds (a) **4b**, (b) **5b** and (c) **6b**. P-XRD Simulated (black) and experimental (red).

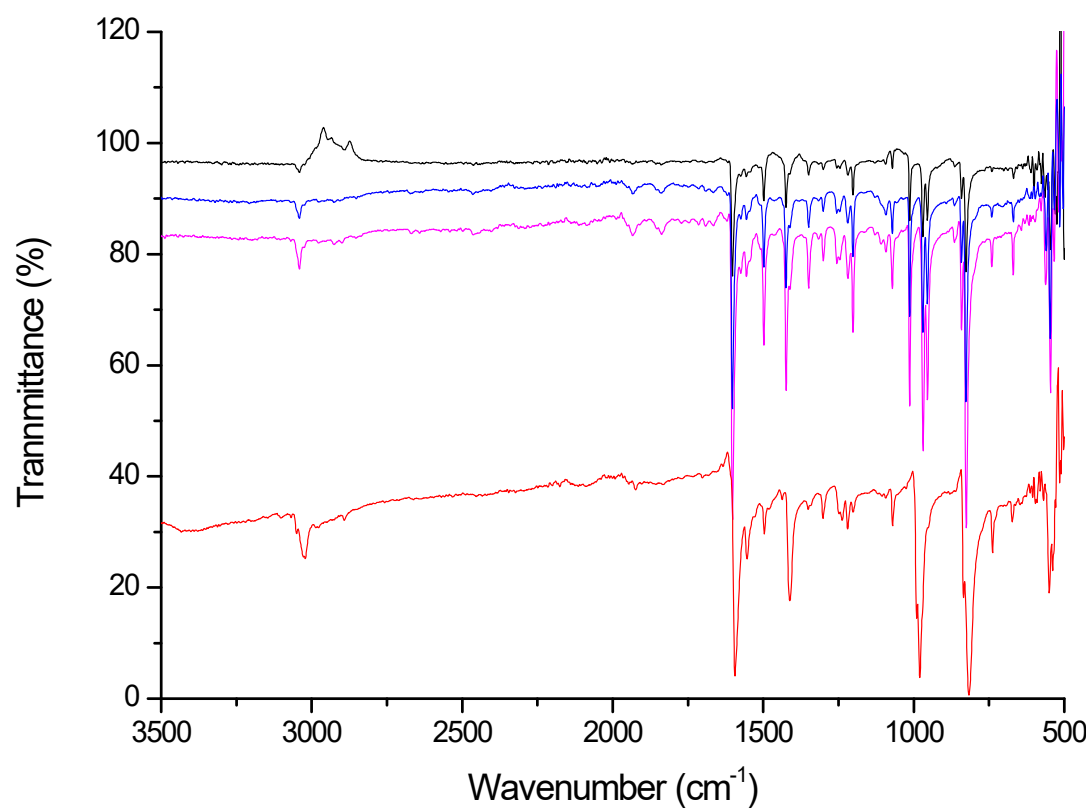

**Figure S8:** Infrared spectrum of compounds **6b**, pink; **5b**, blue; **4b**, black, and BPEE ligand in red.



**2. DFT calculations to explore  $[\text{ZnX}_2(\text{BPE})]_n$  (X=Cl (**1a**), Br (**2a**), and I (**3a**))**  
**theoretical band gaps and correlation with the experimental ones.**

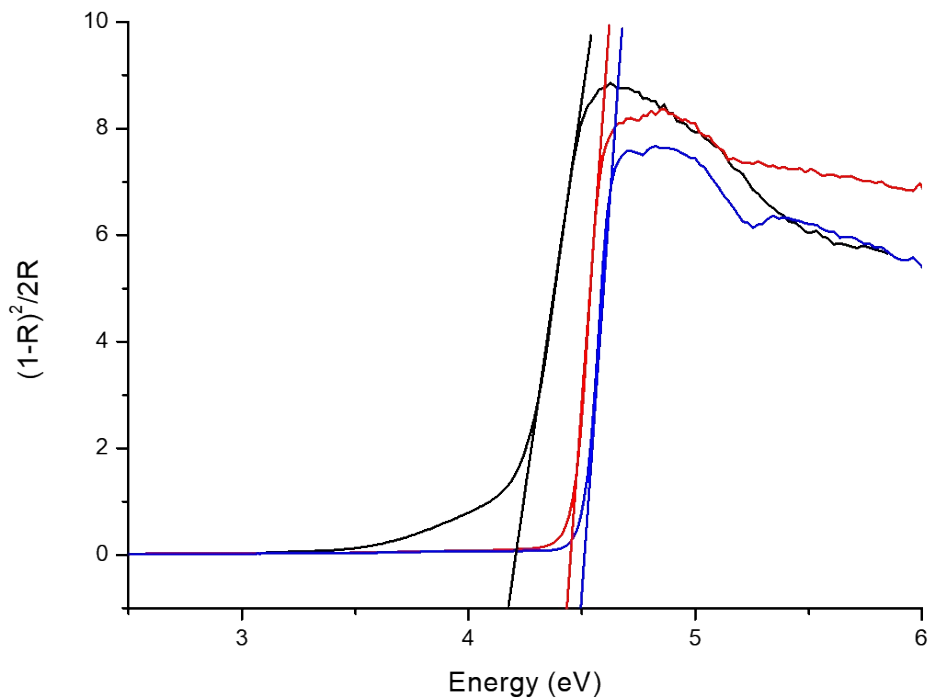

**Figure S9\_** Experimental Band gap values by diffuse reflectance: **3a** (black), **2a** (red), and **1a** (blue).

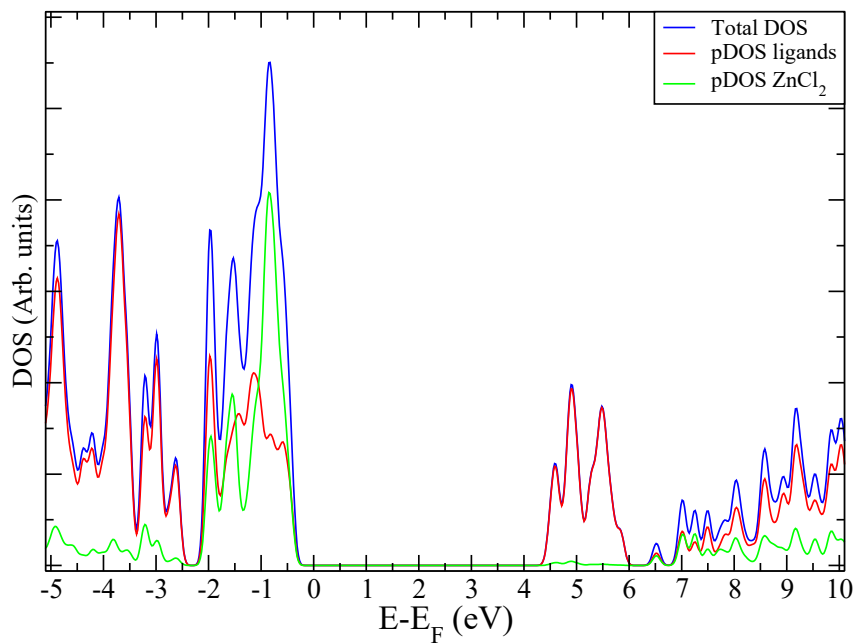

**Figure S10.** Density of States of **1a** and projection on the atoms of ligands and on the atoms of the  $\text{ZnCl}_2$  unit.

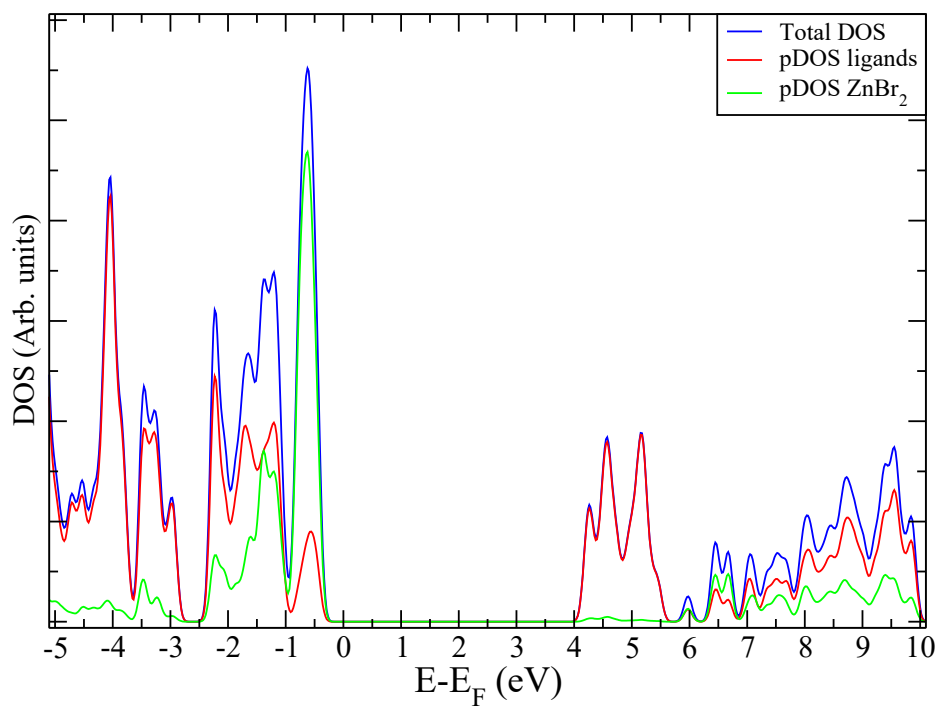

**Figure S11:** Density of States of **2a** and projection on the atoms of ligands and on the atoms of the  $\text{ZnBr}_2$  unit.

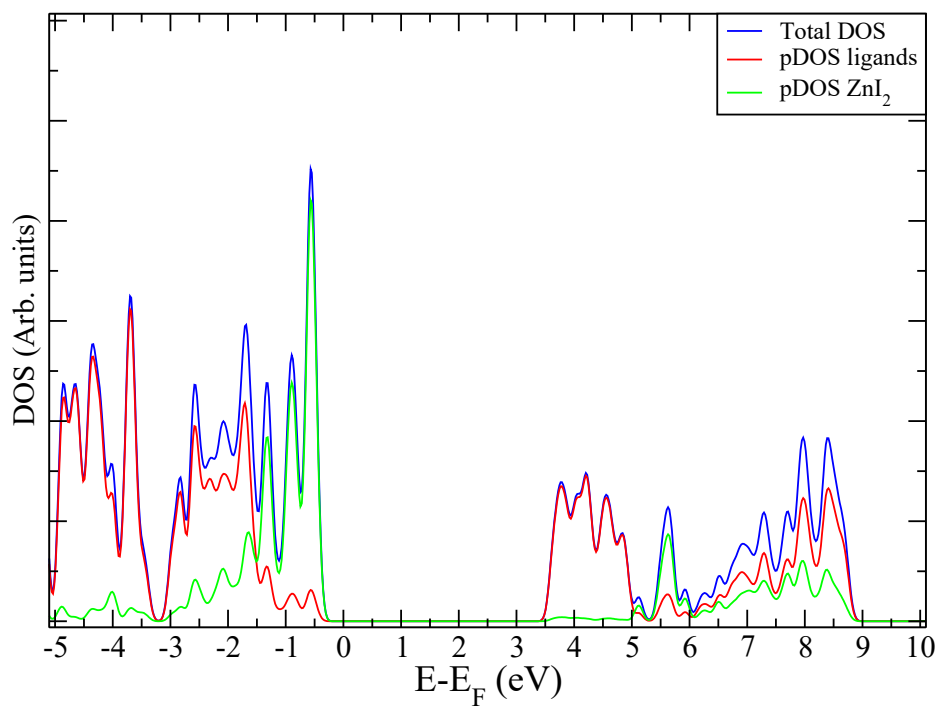

**Figure S12:** Density of States of **3a** and projection on the atoms of ligands and the atoms of the  $\text{ZnI}_2$  unit.

**Table S1.** Atomic charges of the Zn, the halogen, and the nitrogen on the  $[\text{ZnX}_2(\text{BPE})]_n$  (X= Cl (**1a**), Br (**2a**), and I (**3a**)) compounds.

| Atom | <b>1a</b> | <b>2a</b> | <b>3a</b> |
|------|-----------|-----------|-----------|
| Zn   | 1.20      | 1.12      | 1.02      |
| X    | -0.70     | -0.64     | -0.57     |
| N    | -1.32     | -1.34     | -1.34     |

**3. Calculation of Atomic Economy (AE) and E-factor in  $[\text{ZnX}_2(\text{BPE})]_n$ ,  $[\text{ZnX}_2(\text{BPPE})]_n$  and  $[\text{Cu}_2\text{X}_2(\text{BPPE})]_n$  (X=Cl, Br, and I) compounds using the optimizing methodologies employing environmentally friendly procedures.**

**Table S2.** E-Factor and AE in CPs

|                 | <b>1a</b> | <b>2a</b> | <b>3a</b> | <b>1b</b> | <b>2b</b> | <b>3b</b> | <b>4b</b> | <b>5b</b> | <b>6b</b> | <b>4b*</b>  | <b>5b*</b>  | <b>6b*</b>  |
|-----------------|-----------|-----------|-----------|-----------|-----------|-----------|-----------|-----------|-----------|-------------|-------------|-------------|
| <b>E-factor</b> | 0,17      | 0,08      | 0,02      | 0,09      | 0,05      | 0,05      | 0,21      | 0,02      | 0,02      | <i>1.98</i> | <i>1.16</i> | <i>1.12</i> |
| <b>AE</b>       | 0,77      | 0,85      | 0,87      | 0,78      | 0,84      | 0,83      | 0,86      | 0,9       | 0,84      | <i>0.33</i> | <i>0.46</i> | <i>0.36</i> |

\*Previously reported

**4. DFT calculations to explore  $[\text{ZnX}_2(\text{BPPE})]_n$  ( $X=\text{Cl}$  (**1b**), Br (**2b**), and I (**3b**))**  
**theoretical band gaps and correlation with the experimental ones.**

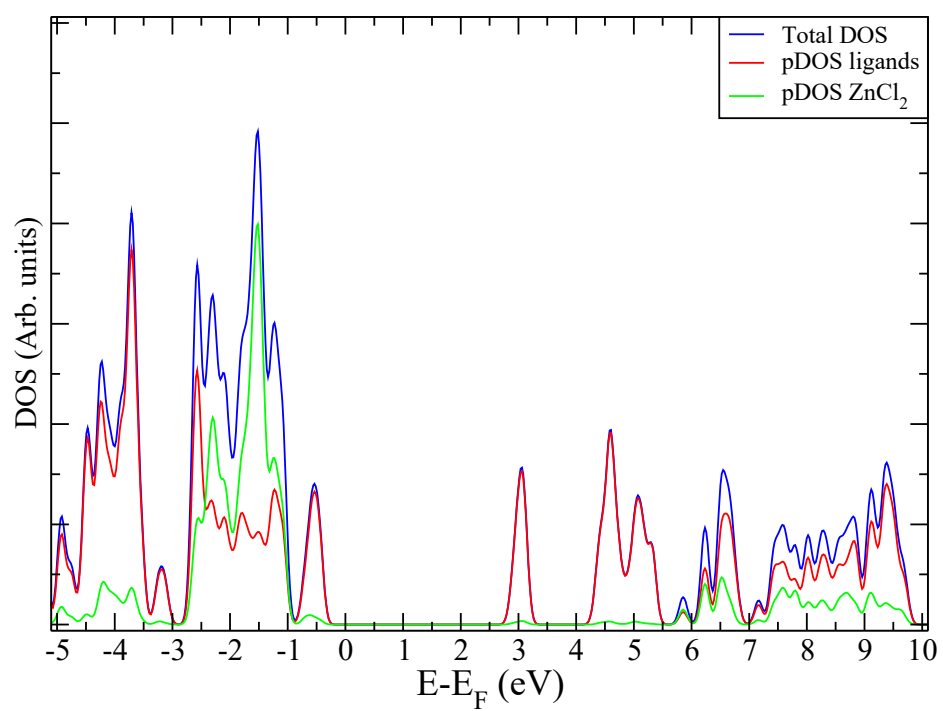

**Figure S13:** Density of States of **1b**, and projection on the atoms of ligands and on the atoms of the  $\text{ZnCl}_2$  unit.

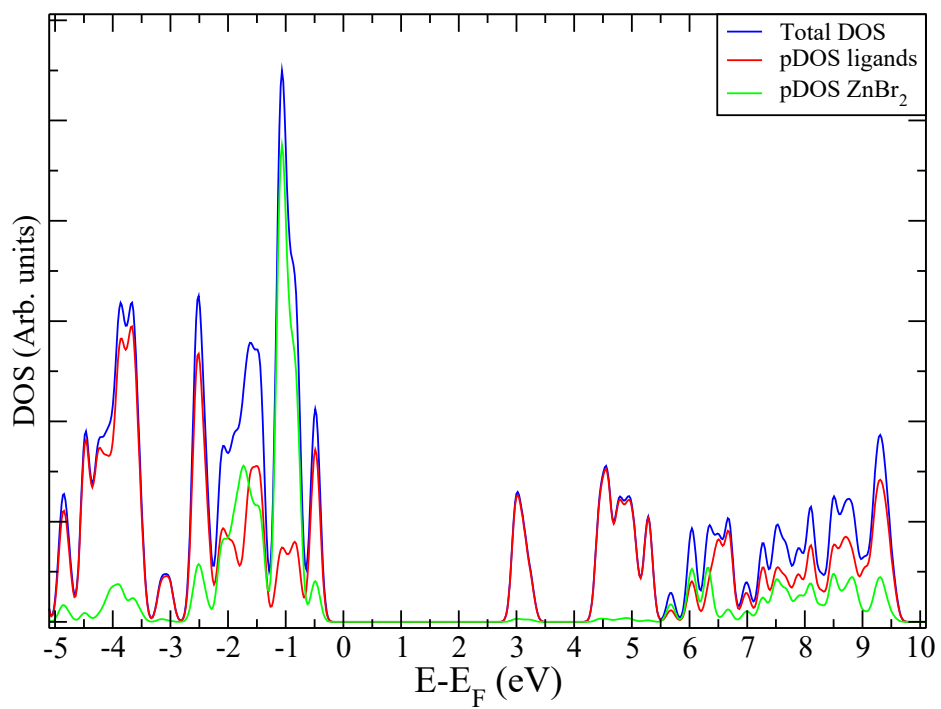

**Figure S14:** Density of States of **2b**, and projection on the atoms of ligands and on the atoms of the  $ZnBr_2$  unit.

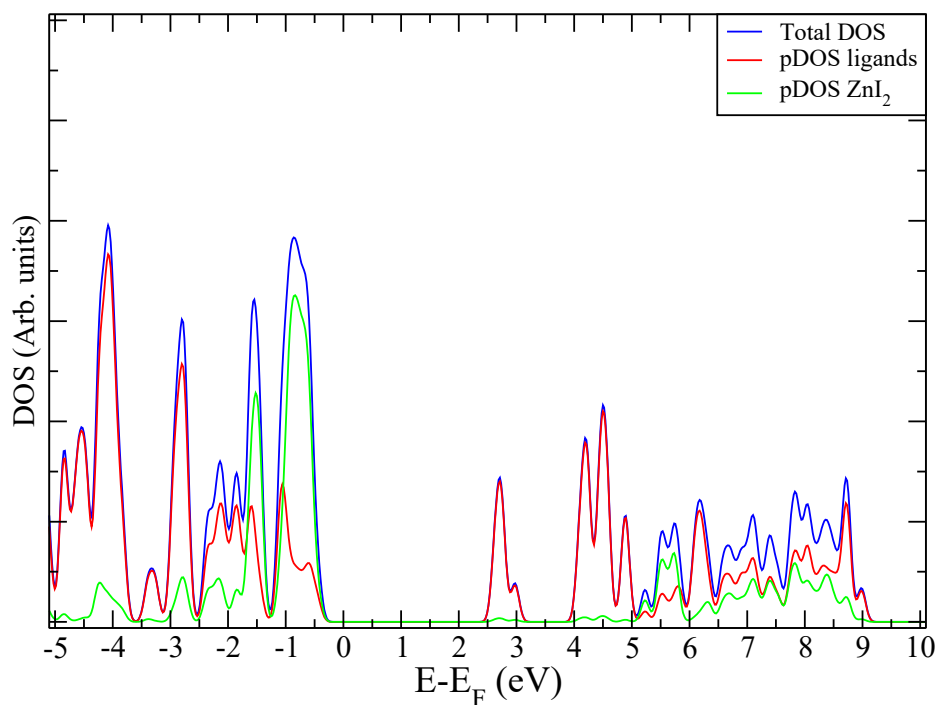

**Figure S15:** Density of States of **3b**, and projection on the atoms of ligands and on the atoms of the  $\text{ZnI}_2$  unit.

**Table S3:** Atomic charges of the Zn, the halogen, and the nitrogen on the  $[\text{ZnX}_2(\text{BPPE})]_n$  ( $\text{X}=\text{Cl}$  (**1b**),  $\text{Br}$  (**2b**), and  $\text{I}$  (**3b**)) compounds.

| Atom | <b>1b</b> | <b>2b</b> | <b>3b</b> |
|------|-----------|-----------|-----------|
| Zn   | 1.20      | 1.12      | 1.02      |
| X    | -0.70     | -0.64     | -0.56     |
| N    | -1.35     | -1.33     | -1.34     |

### 5. Study of the particle size of $[\text{ZnX}_2(\text{BPPE})]_n$ ( $\text{X}=\text{Cl}$ (**1b**), $\text{Br}$ (**2b**), and $\text{I}$ (**3b**)) compounds

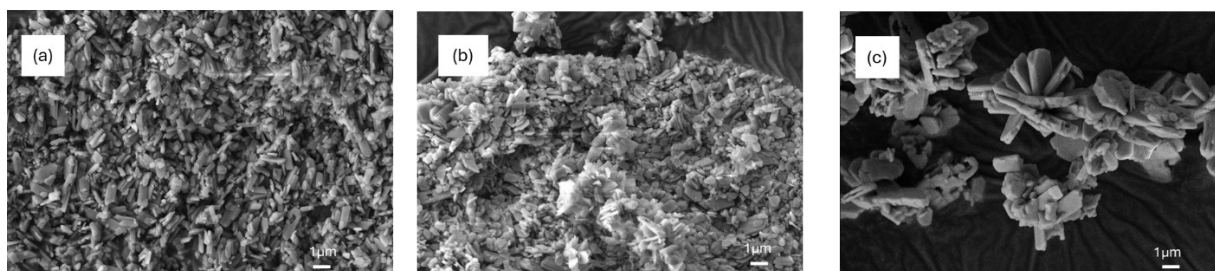

**Figure S16:** SEM images of the compounds: (a) **1b**, (b) **2b**, and (c) **3b**.

**Table S4:** Particle size of  $[\text{ZnX}_2(\text{BPPE})]_n$  (X=Cl (**1b**), Br (**2b**), and I (**3b**)) measured on 50 particles

|                               | <b>1b</b>     | <b>2b</b>     | <b>3b</b>     |
|-------------------------------|---------------|---------------|---------------|
| Size ( $\mu\text{m}$ ) length | $0.9 \pm 0,5$ | $0.8 \pm 0,3$ | $2.5 \pm 0.7$ |
| Size ( $\mu\text{m}$ ) width  | $0.4 \pm 0,2$ | $0.7 \pm 0,4$ | $0.9 \pm 0,4$ |

## 6. Crystallographic data and structure analysis.

**Table S5:** Crystallographic data and structure refinement details of **3a**, and **3b** compounds.<sup>a,b</sup>

|                            | <b>3a</b>                                                 | <b>3b</b>                                                 |
|----------------------------|-----------------------------------------------------------|-----------------------------------------------------------|
| empirical formula          | $\text{C}_{12}\text{H}_{12}\text{I}_2\text{N}_2\text{Zn}$ | $\text{C}_{12}\text{H}_{10}\text{I}_2\text{N}_2\text{Zn}$ |
| formula weight             | 503.41                                                    | 501.39                                                    |
| crystal system             | Monoclinic                                                | Triclinic                                                 |
| space group                | $C2/c$ (15)                                               | $P-1$ (2)                                                 |
| $a$                        | 16.3937(5)                                                | 5.8775(2)                                                 |
| $b$                        | 11.8607(3)                                                | 8.0332(2)                                                 |
| $c$                        | 16.2836(4)                                                | 15.8128(4)                                                |
| $\alpha$                   | 90                                                        | 102.779(2)                                                |
| $\beta$                    | 108.595(3)                                                | 91.996(2)                                                 |
| $\gamma$                   | 90                                                        | 91.958(2)                                                 |
| $V$ ( $\text{\AA}^3$ )     | 3000.91(15)                                               | 727.00(4)                                                 |
| $Z$                        | 8                                                         | 2                                                         |
| $T$ (K)                    | 200.0(1)                                                  | 298(1)                                                    |
| $\lambda$ ( $\text{\AA}$ ) | 1.54184                                                   | 0.71073                                                   |
| Sizes (mm)                 | 0.12/0.07/0.02                                            | 0.25/0.10/0.01                                            |
| Shape                      | Prism                                                     | Prism                                                     |

|                                                                                |                                                                      |                                                                  |
|--------------------------------------------------------------------------------|----------------------------------------------------------------------|------------------------------------------------------------------|
| Color                                                                          | Colorless                                                            | Colorless                                                        |
| Max. and medium $\Delta/\sigma$                                                | 0.001/0.000                                                          | 0.001/0.000                                                      |
| $\theta$ interval                                                              | 4.690 – 68.326                                                       | 2.602 – 25.364                                                   |
| hkl interval                                                                   | $-19 \leq h \leq 19$<br>$-13 \leq k \leq 14$<br>$-19 \leq l \leq 19$ | $-7 \leq h \leq 7$<br>$-9 \leq k \leq 9$<br>$-18 \leq l \leq 19$ |
| $\rho_c$ (g·cm <sup>-3</sup> )                                                 | 2.228                                                                | 2.290                                                            |
| $\mu$ (cm <sup>-1</sup> )                                                      | 34.422                                                               | 5.916                                                            |
| $F(000)$                                                                       | 1872                                                                 | 464                                                              |
| S <sup>a</sup>                                                                 | 1.040                                                                | 1.063                                                            |
| R <sub>int</sub>                                                               | 0.0414                                                               | 0.0446                                                           |
| Parameters                                                                     | 154                                                                  | 154                                                              |
| Weight scheme <sup>c</sup>                                                     | Shelx                                                                | Shelx                                                            |
| final R indices                                                                |                                                                      |                                                                  |
| [I > 2 $\sigma$ (I)] R <sub>1</sub> <sup>b</sup> /wR <sub>2</sub> <sup>c</sup> | 0.0323/0.0870                                                        | 0.0271/0.0614                                                    |
| all data R <sub>1</sub> <sup>b</sup> /wR <sub>2</sub> <sup>c</sup>             | 0.0345/0.0887                                                        | 0.0331/0.0641                                                    |

$$^a S = [\sum w(F_0^2 - F_c^2)^2 / (N_{\text{obs}} - N_{\text{param}})]^{1/2}. \quad ^b R_1 = \sum ||F_0| - |F_c|| / \sum |F_0|. \quad ^c wR_2 =$$

$$[\sum w(F_0^2 - F_c^2)^2 / \sum wF_0^2]^{1/2}; \quad w = 1 / [\sigma^2(F_0^2) + (aP)^2 + b] \quad \text{where } P = (\max(F_0^2, 0) + 2F_c^2) / 3;$$

$$[\text{ZnI}_2(\text{BPE})]_n \quad (a = 0.0630, b = 2.1271) \quad \text{and} \quad [\text{ZnI}_2(\text{BPPE})]_n \quad (a = 0.0256, b = 0.4052).$$

**Table S6:** Selected bond lengths (Å) and angles (°) for compounds **3a**, and **3b**.<sup>a</sup>

|  | <b>3a</b> | <b>3b</b> |
|--|-----------|-----------|
|--|-----------|-----------|



---

|           |                          |                            |
|-----------|--------------------------|----------------------------|
| Zn1-I1    | 2.5884(5)                | 2.5430(5)                  |
| Zn1-I2    | 2.5526(5)                | 2.5891(6)                  |
| Zn1-N1    | 2.048(3)                 | 2.064(3)                   |
| Zn1-N2    | 2.056(3) <sup>i</sup>    | 2.065(3)                   |
| Zn1···Zn1 | 13.3735(8) <sup>ii</sup> | 13.4718(10) <sup>iii</sup> |
| I1-Zn1-I2 | 121.62(2)                | 124.69(2)                  |
| I1-Zn1-N1 | 107.09(9)                | 108.69(10)                 |
| I1-Zn1-N2 | 107.90(9) <sup>i</sup>   | 109.17(10)                 |
| I2-Zn1-N1 | 108.04(9)                | 104.09(10)                 |
| I2-Zn1-N2 | 107.30(9) <sup>i</sup>   | 103.46(10)                 |
| N1-Zn1-N2 | 103.45(14) <sup>i</sup>  | 105.12(14)                 |

---

aSymmetry codes: (i)  $x+1/2, -y+1/2, z+1/2$ ; (ii)  $x-1/2, -y+1/2, z-1/2$ ; (iii)  $-x+2, -y+1, -z+2$ .

**Table S7:** Hydrogen bonding interactions in compounds **3a**, and **3b**.<sup>a</sup>

| <b>3a</b>                   |       |          |         |
|-----------------------------|-------|----------|---------|
| D–H...Ab                    | H...A | D...A    | D–H...A |
| C11–H11...I1 <sup>i</sup>   | 3.09  | 3.767(4) | 129.9   |
| C5–H5...I1                  | 3.16  | 3.806(4) | 126.6   |
| C4–H4...I2 <sup>ii</sup>    | 3.31  | 4.094(4) | 141.5   |
| C10–H10...I1 <sup>iii</sup> | 3.28  | 3.900(4) | 124.9   |
| C2–H2...I1 <sup>iv</sup>    | 3.29  | 4.217(4) | 165.1   |

  

| <b>3b</b>             |       |          |         |
|-----------------------|-------|----------|---------|
| D–H...Ab              | H...A | D...A    | D–H...A |
| C1 H1 I1              | 3.26  | 3.873(4) | 125.3   |
| C4 H4 I2 <sup>i</sup> | 3.29  | 4.021(5) | 137.2   |
| C5 H5 I2              | 3.26  | 3.799(5) | 119.1   |
| C7 H7 I1              | 3.28  | 3.888(4) | 124.7   |
| C11 H11 I2            | 3.19  | 3.758(4) | 121.6   |

<sup>a</sup>Symmetry codes for **3a**: (i)  $x-1/2, -y+1/2, z-1/2$ ; (ii)  $x, -y+1, z-1/2$ ; (iii)  $5\_666 -x+1, -y+1, -z+1$ ; (iv)  $x-1/2, y-1/2, z$ . Symmetry codes for **3b**: (i)  $2\_677 -x+1, -y+2, -z+2$ .

b D = donor; A = acceptor.

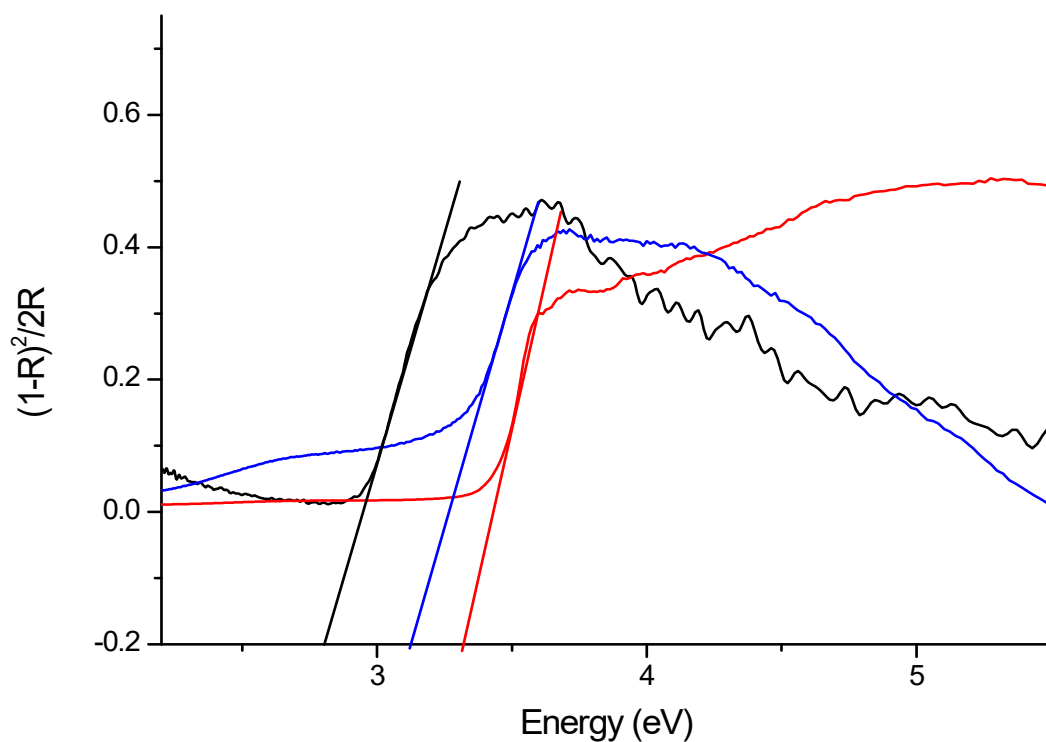

**Figure S17.** Band gap experimental value by diffuse reflectance: **1b**, black, **2b** red, and **3b**, blue.

## 7. Analysis of the coordination bonds distances distribution.

Coordination bond distribution found in the CSD database for  $\text{ZnX}_2\text{N}_2$  ( $\text{X} = \text{Cl}, \text{Br}$ , and I) coordination environments in which the actual coordination bond distances of  $[\text{ZnX}_2(\text{BPE})]_n$  and  $[\text{ZnX}_2(\text{BPEE})]_n$  have been included as vertical lines. The color code is indicated in the graph. The vertical white line corresponds to the median value.

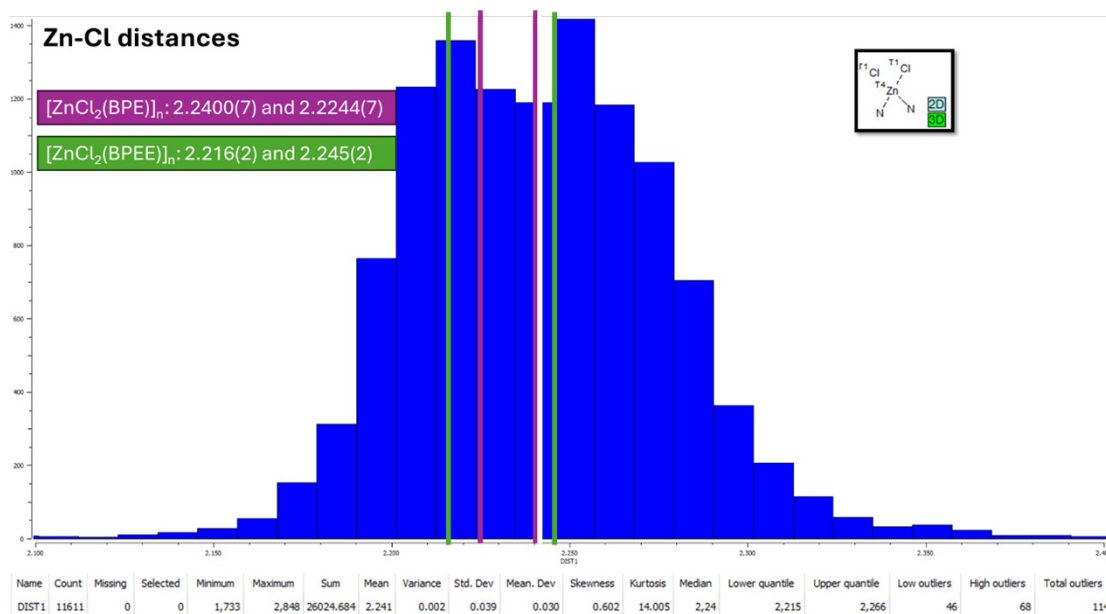

**Figure S18:** Zn-Cl coordination bond distances found in compounds: (a)  $[\text{ZnCl}_2(\text{BPE})]_n$  and  $[\text{ZnCl}_2(\text{BPEE})]_n$  placed within the distribution found in the CSD database for analogous  $\text{ZnCl}_2\text{N}_2$  coordination environments.

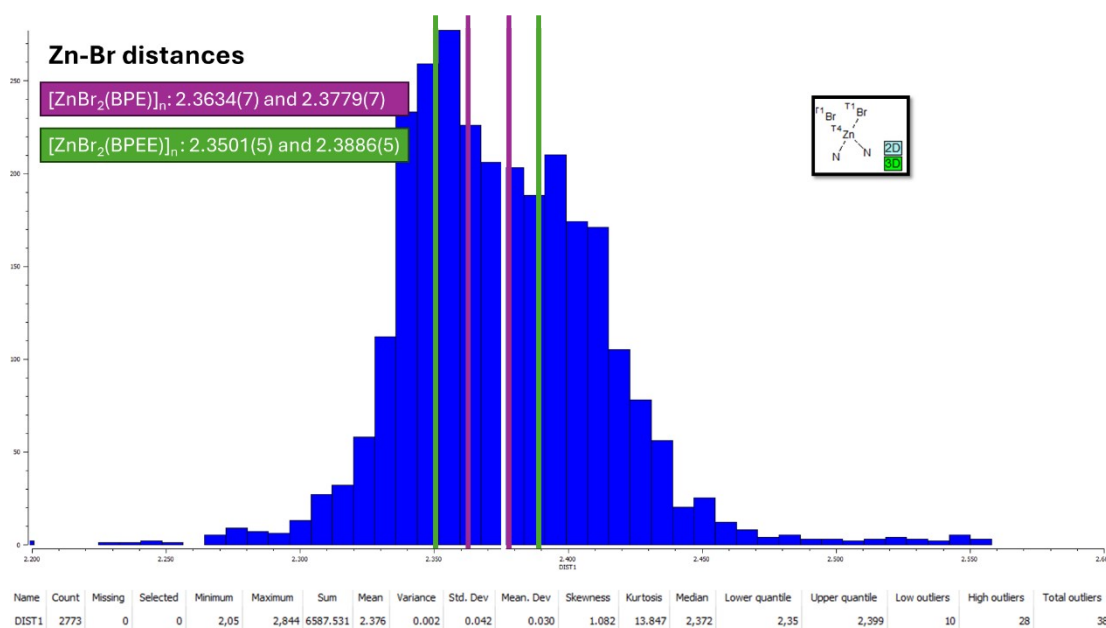

**Figure S19:** Zn-Br coordination bond distances found in compounds: (a)  $[\text{ZnBr}_2(\text{BPE})]_n$  and  $[\text{ZnBr}_2(\text{BPEE})]_n$  placed within the distribution found in the CSD database for analogous  $\text{ZnBr}_2\text{N}_2$  coordination environments.

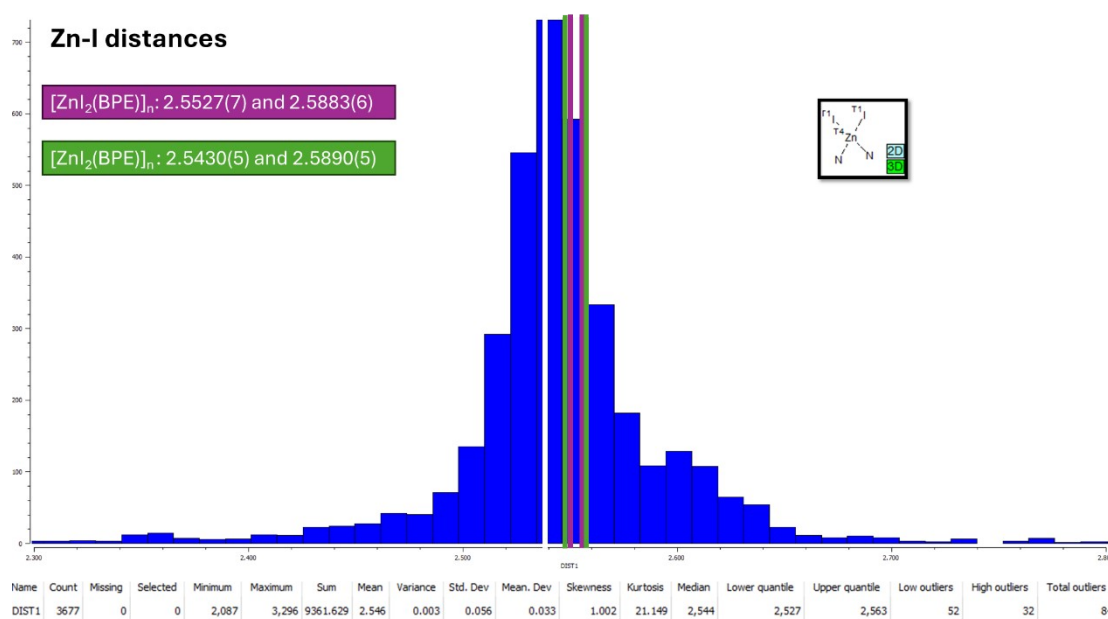

**Figure S20:** Zn-I coordination bond distances found in compounds: (a)  $[\text{ZnI}_2(\text{BPE})]_n$  and  $[\text{ZnI}_2(\text{BPPE})]_n$  placed within the distribution found in the CSD database for analogous  $\text{ZnI}_2\text{N}_2$  coordination environments.

## 8. Water and thermal stability of $[\text{ZnX}_2(\text{BPPE})]_n$ .

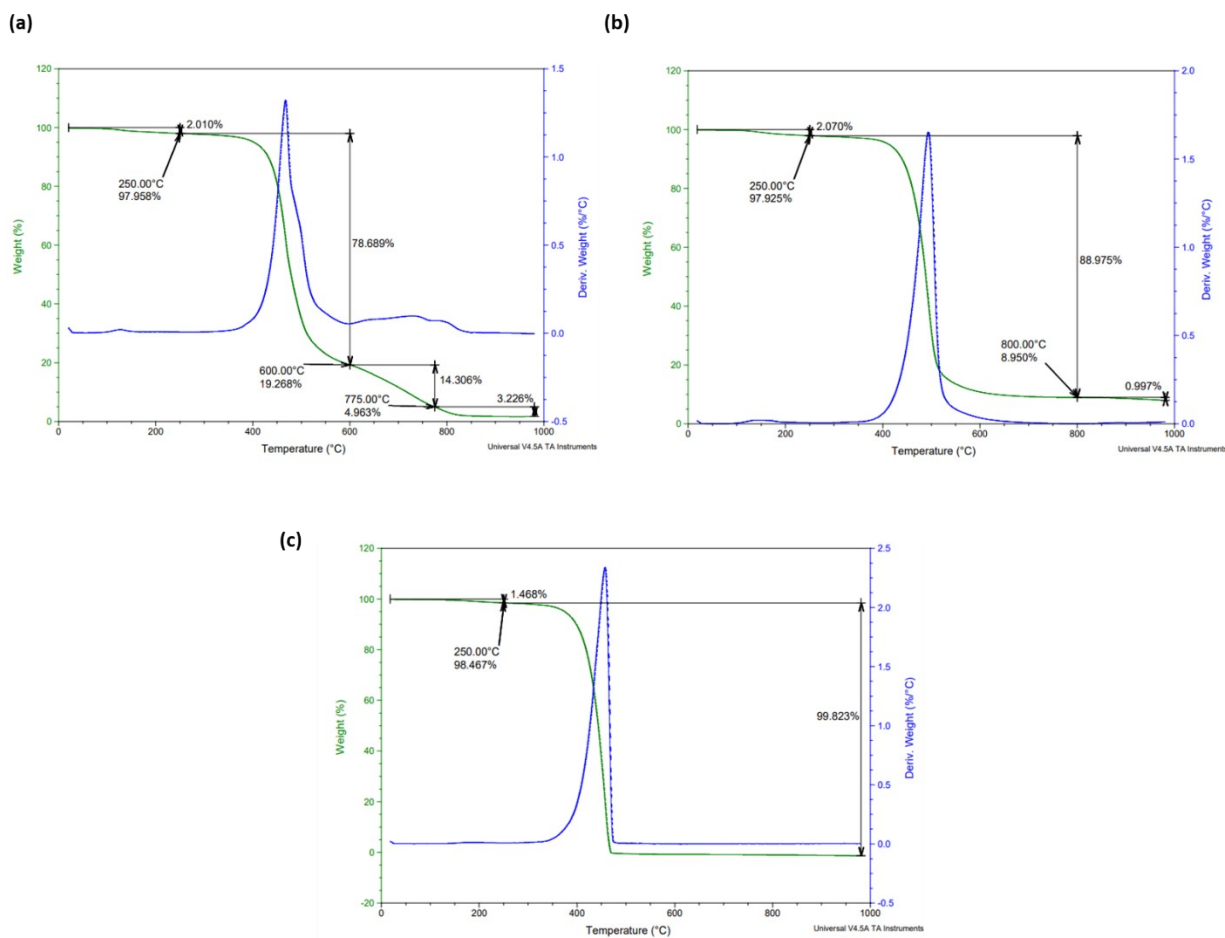

**Figure S21:** Thermogravimetric analysis (TGA) of the compounds: a) **1b**, b) **2b** and c) **3b**.

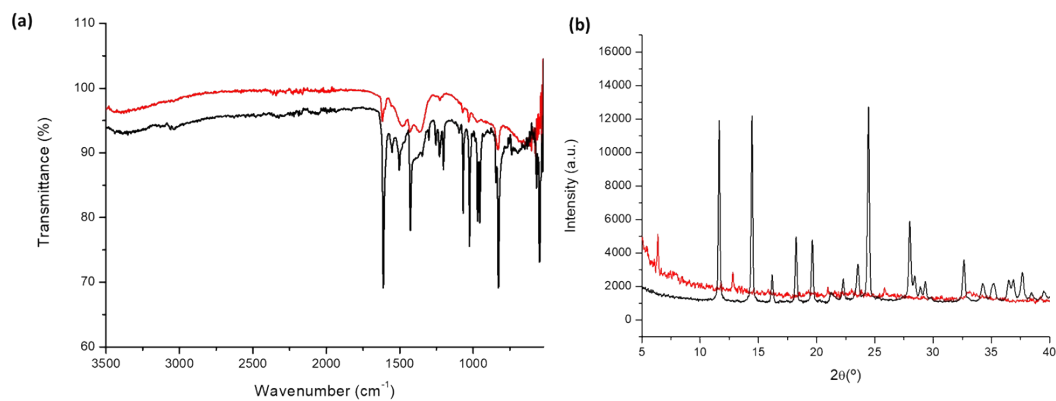

**Figure S22:** Example of water behavior of **2b**: a) IR and b) P-XRD initial (black) and [pH > 8.5] (red)

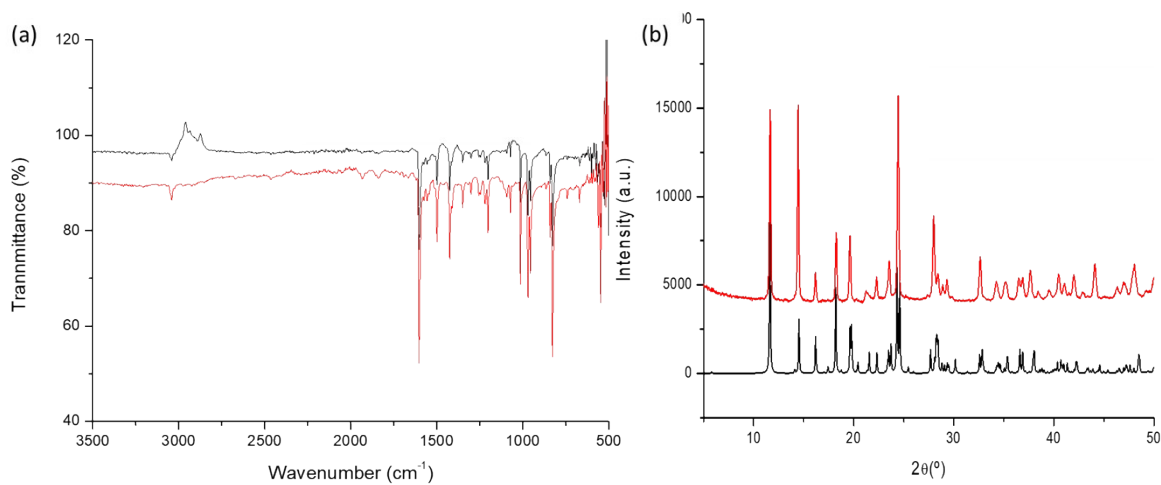

**Figure S23:** Example **2b**: a) IR and b) P-XRD initial (black) and 4.2 < pH < 8.4 (red)

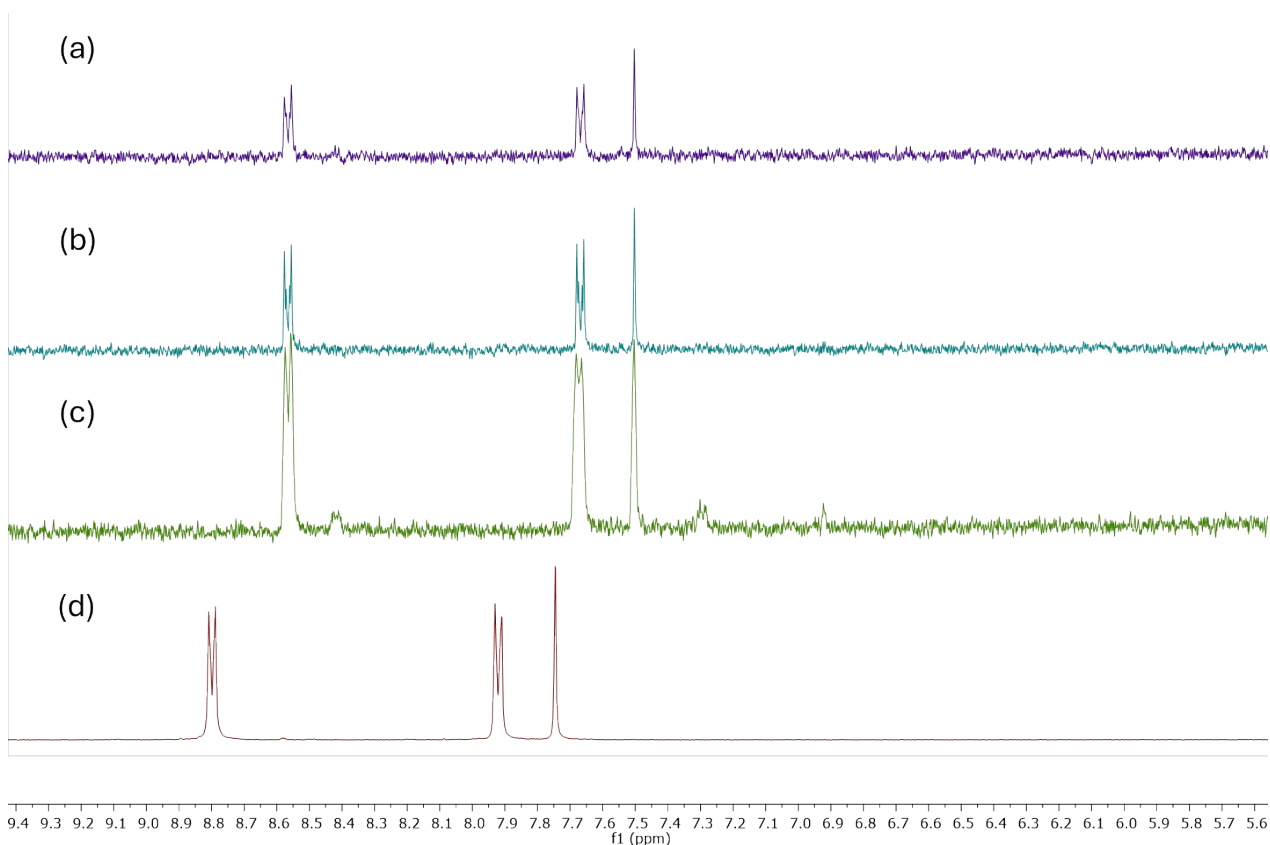

**Figure S24:** <sup>1</sup>H-NMR study with **3b** in D<sub>2</sub>O: a) t<sub>0</sub>, b) dark t<sub>f</sub>= 20 min, c) irradiation (t<sub>f</sub>= 20 min in photoreactor 300-600 nm), and d) BPEE in D<sub>2</sub>O.

**Table S8:** <sup>1</sup>H-NMR assignment with BPEE / [ZnI<sub>2</sub>(BPEE)]<sub>n</sub> and irradiation (hν) in D<sub>2</sub>O

| Compound                    | (a)         | (b)         | (c)         |
|-----------------------------|-------------|-------------|-------------|
| BPEE                        | 7.75s       | 7.91d       | 8.82d       |
| 3b                          | 7.45s       | 7.65d       | 8.55d       |
| 3b + 20 min in photoreactor | 7.45 + 6.9s | 7.65 + 7.3d | 8.55 + 8.4d |

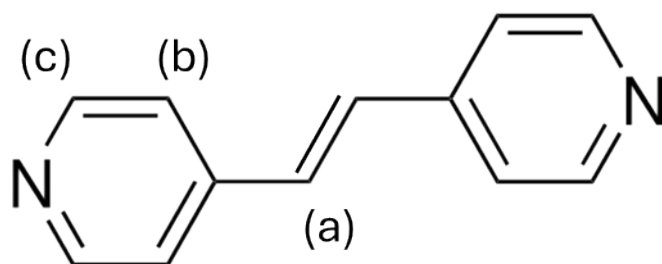

**Figure S25:** Proton assignment in the free ligand BPEE

### 9. Study of the particle size of $[\text{Cu}_2\text{X}_2(\text{BPEE})]_n$

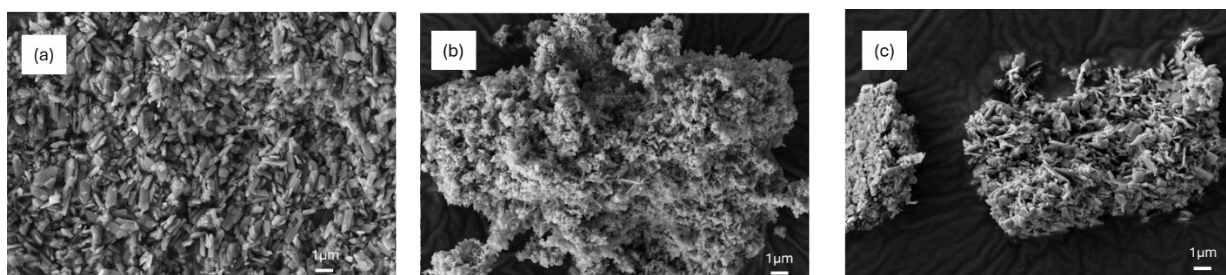

**Figure S26:** SEM of the compounds: a) **4b**, b) **5b**, and c) **6b**.

**Table S9:** Particle size with the average of  $[\text{Cu}_2\text{X}_2(\text{BPEE})]_n$  compounds over 50 particles.

|                               | <b>4b</b>     | <b>5b</b>      | <b>6b</b>     |
|-------------------------------|---------------|----------------|---------------|
| Size ( $\mu\text{m}$ ) length | $1.1 \pm 0.5$ | $0.9 \pm 0.5$  | $1.1 \pm 0.7$ |
| Size ( $\mu\text{m}$ ) width  | $0.5 \pm 0.2$ | $0.2 \pm 0.07$ | $0.4 \pm 0.2$ |



10. DFT calculations to explore 2D  $[\text{Cu}_2\text{X}_2(\text{BPEE})]_n$  ( $\text{X} = \text{Cl}$  (4b), Br (5b), I (6b)) theoretical band gaps and correlation with the experimental ones.

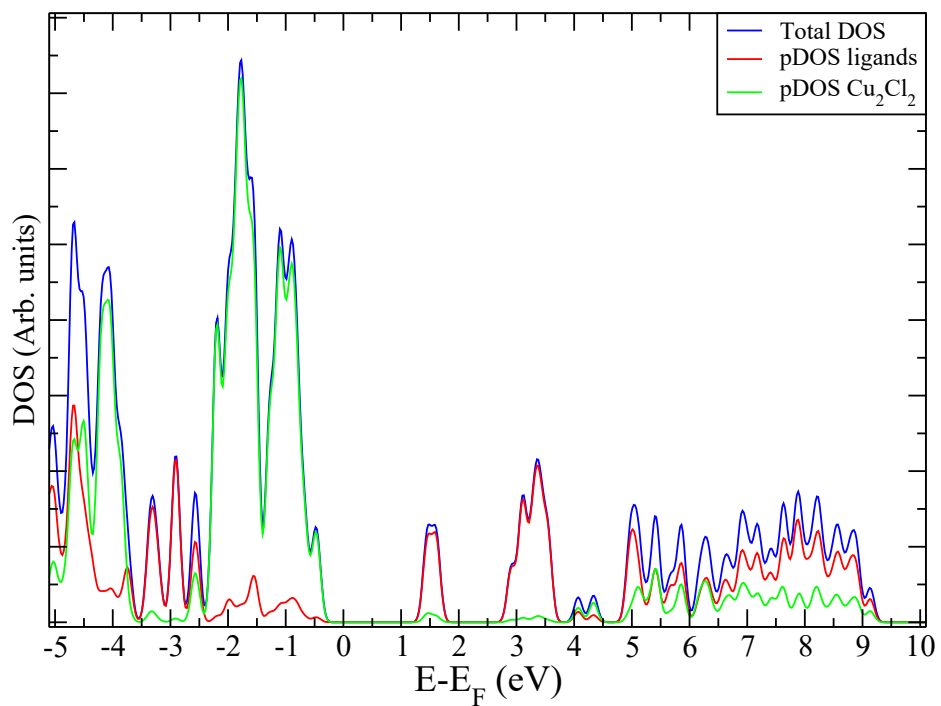

**Figure S27:** Density of States of **4b**, and projection on the atoms of ligands and the atoms of the  $\text{Cu}_2\text{Cl}_2$  unit.

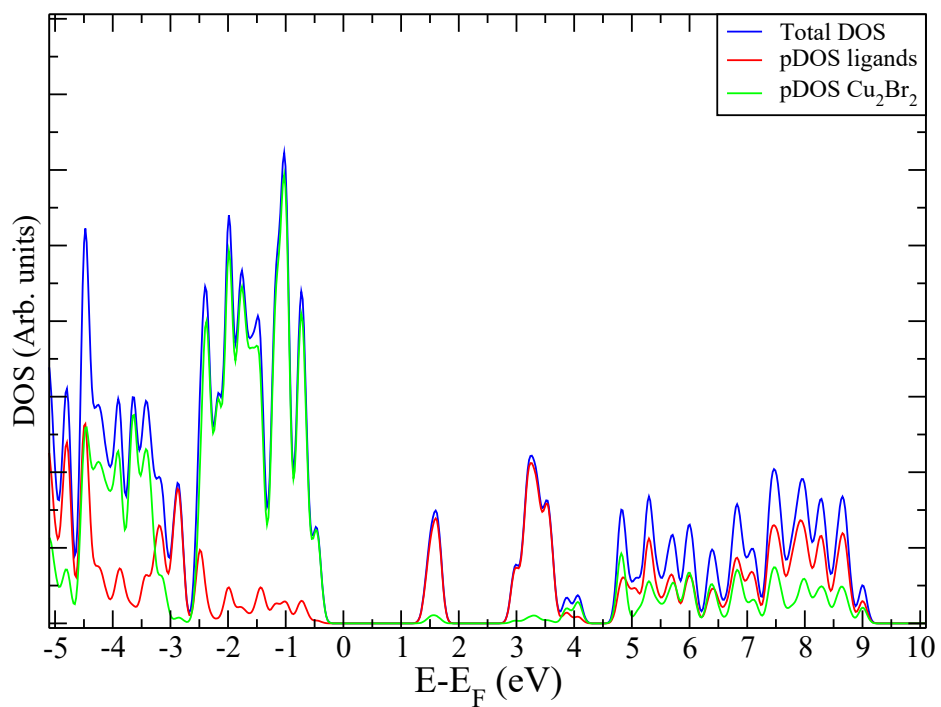

**Figure S28:** Density of States of **5b**, and projection on the atoms of ligands and the atoms of the Cu<sub>2</sub>Br<sub>2</sub> unit.

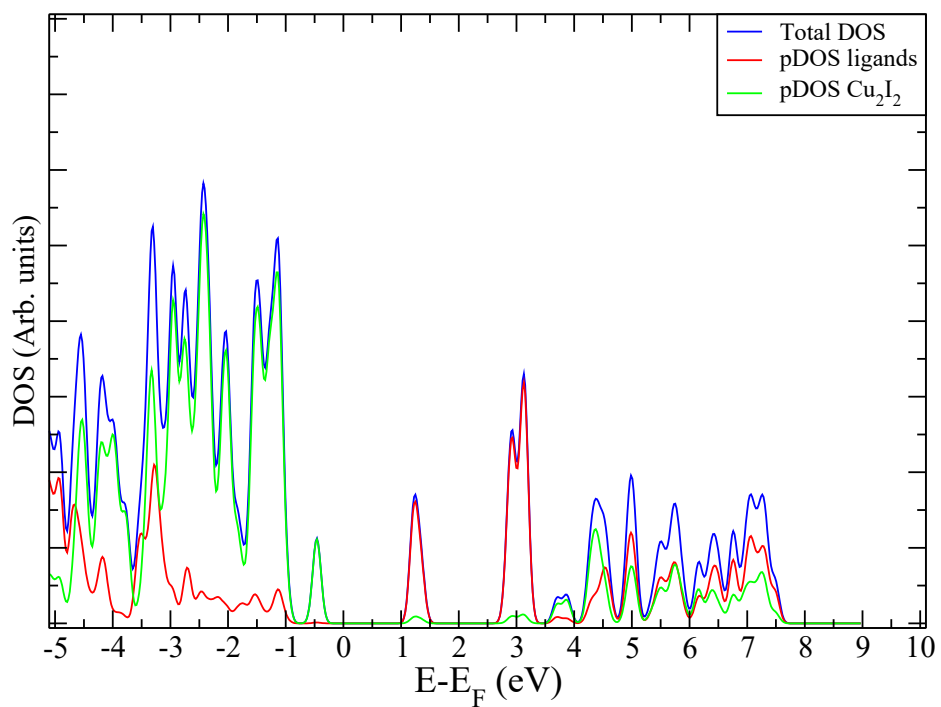

**Figure S29:** Density of States of **6b**, and projection on the atoms of ligands and the atoms of the  $\text{Cu}_2\text{I}_2$  unit.

**Table S10:** Atomic charges of the Cu, the halogen, and the nitrogen on the  $[\text{Cu}_2\text{X}_2(\text{BPEE})]_n$  compounds.

| Atom | <b>4b</b> | <b>5b</b> | <b>6b</b> |
|------|-----------|-----------|-----------|
| Cu   | 0.62      | 0.54      | 0.44      |
| X    | -0.67     | -0.59     | -0.46     |
| N    | -1.27     | -1.27     | -1.26     |

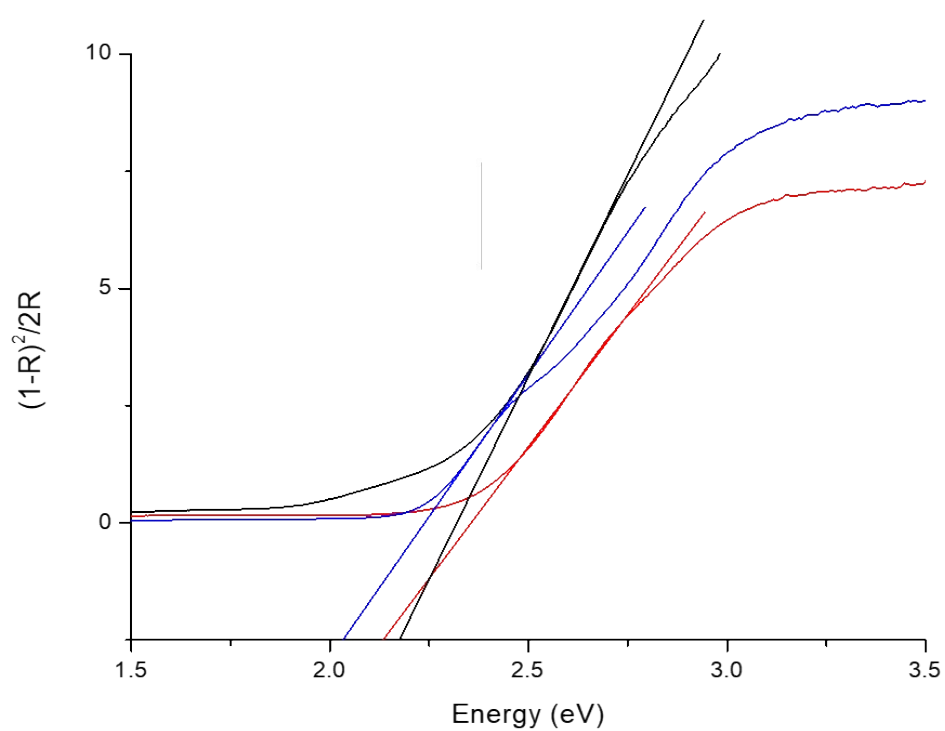

**Figure S30:** Experimental band gap value by diffuse reflectance of **4b** (black), **5b**, (red), and **6b** (blue).

**11. Water and thermal stability of  $[\text{Cu}_2\text{X}_2(\text{BPEE})]_n$  ( $\text{X}=\text{Cl}$  (4b), Br (5b), and I (6b)) compounds.**

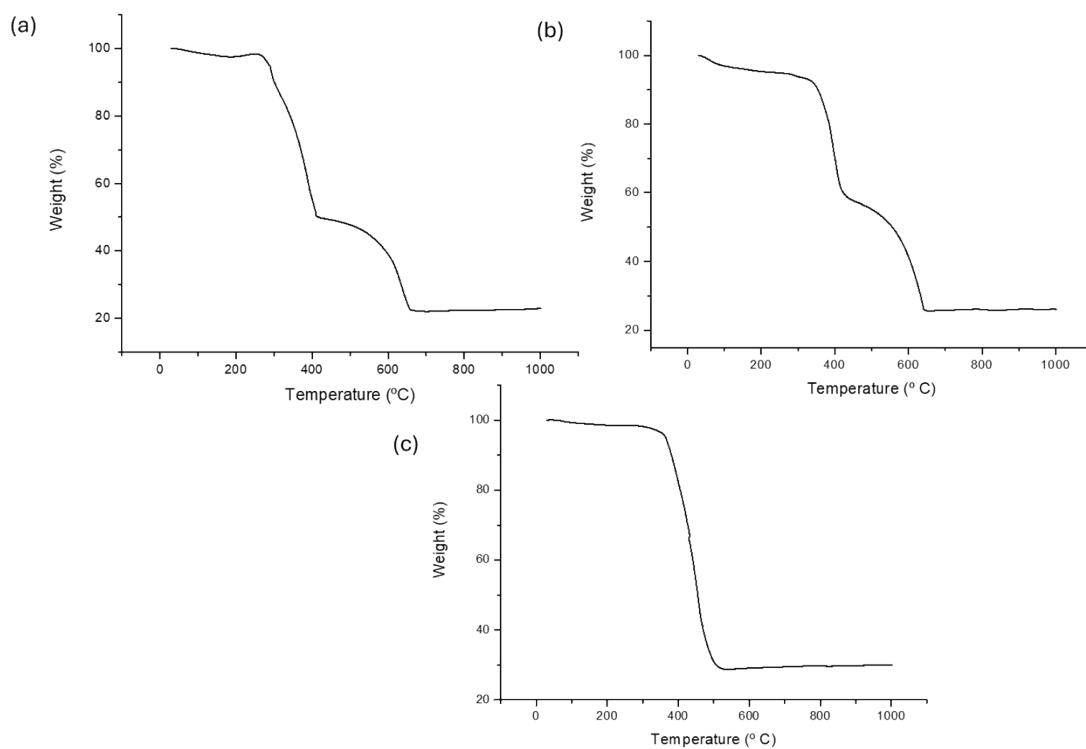

**Figure S31.** Thermogravimetric analysis (TGA) of the compounds: a) **4b**, b) **5b**, and c) **6b**.

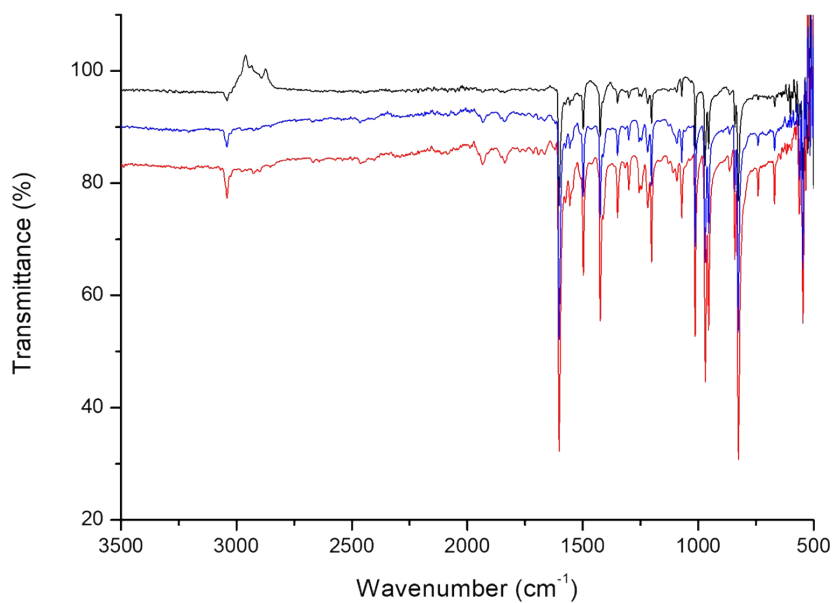

**Figure S32:** IR of  $[\text{Cu}_2\text{I}_2(\text{BPEE})]_n$  (**6b**) (black), between  $2 < \text{pH} < 7$  (red), and between  $7 < \text{pH} < 11$  (blue).

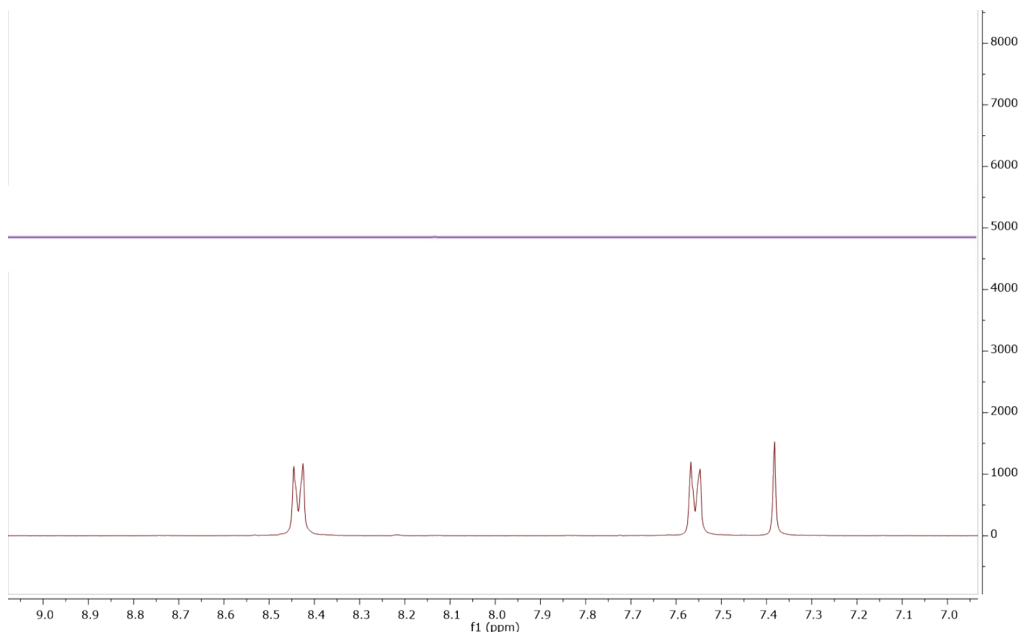

**Figure S33:** <sup>1</sup>H-NMR in D<sub>2</sub>O: **6b** 24h in D<sub>2</sub>O (up), and BPEE ligand (down).

## 12. Study of the photocatalytic efficiency of $[\text{Cu}_2\text{X}_2(\text{BP}EE)]_n$ in the degradation of Methyl blue (MB), Methyl orange (MO), and Tartrazine (Trz).

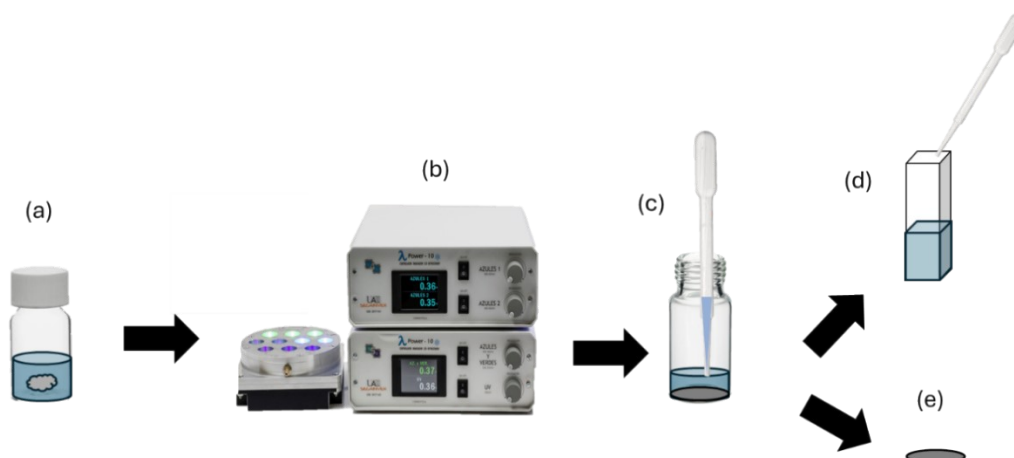

**Figure S34:** Degradation process of dyes with the compounds in the photoreactor: a) 2 mg of catalyst compound is mixed with a  $10^{-5}\text{M}$  organic dye aqueous solution, b) the vial is introduced into the white light photoreactor (300-600 nm) under agitation, c) the degraded dye is separated from the catalyst, d) absorbance loss of dyes by UV-vis is studied, and e) the catalyst is characterized to confirm that it maintains the structure and acts as a heterogeneous catalyst.

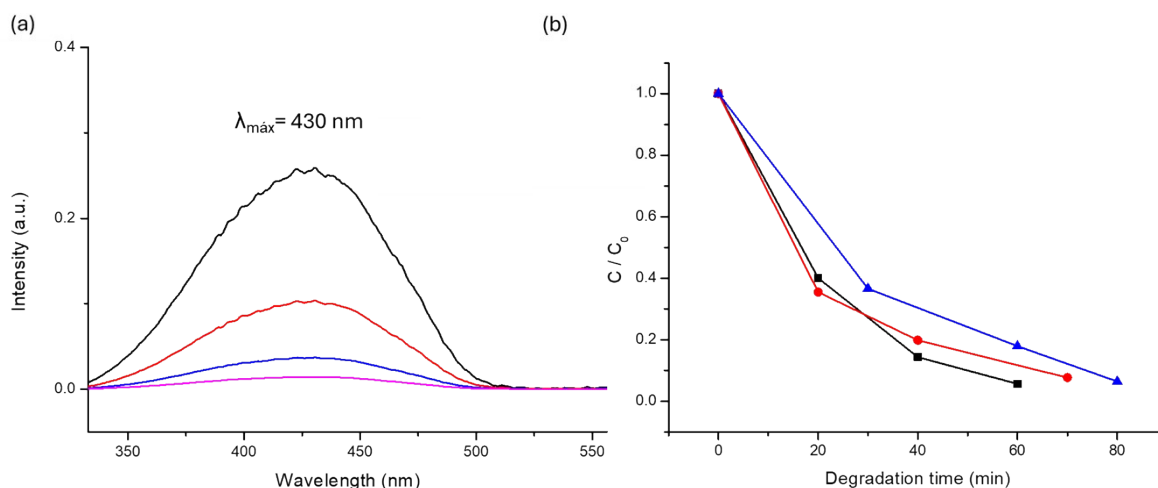

**Figure S35:** MO dye degradation: a) UV-vis degradation from 0 to 60 min for **6b** and b) plots of MO absorbance intensity loss as a function of exposure time under photoreactor, **6b** (black), **5b** (red), **4b** (blue).

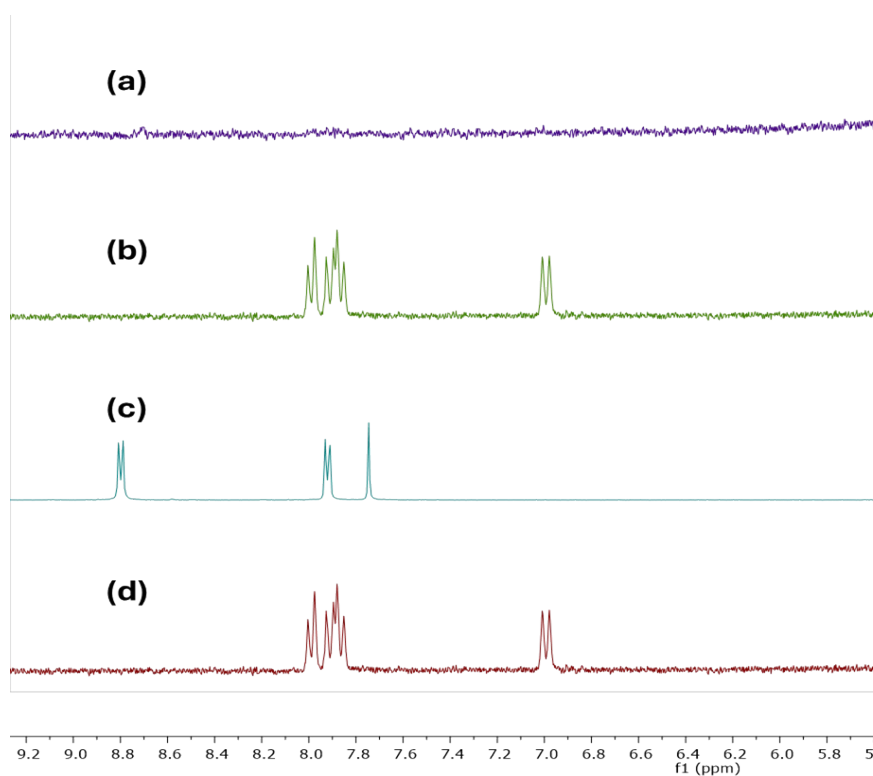

**Figure S36:**  $^1\text{H-NMR}$  study with  $[\text{Cu}_2\text{I}_2(\text{BPEE})]_n$  (**6b**) and  $\text{MO } 10^{-3} \text{ M}$  in  $\text{D}_2\text{O}$ : a)  $6\text{b}+\text{MO}$  ( $t_f$  60 min), b)  $6\text{b}+\text{MO}$  ( $t_0$ ). c and d) BPEE and MO, after 60 min in  $\text{D}_2\text{O}$  respectively.

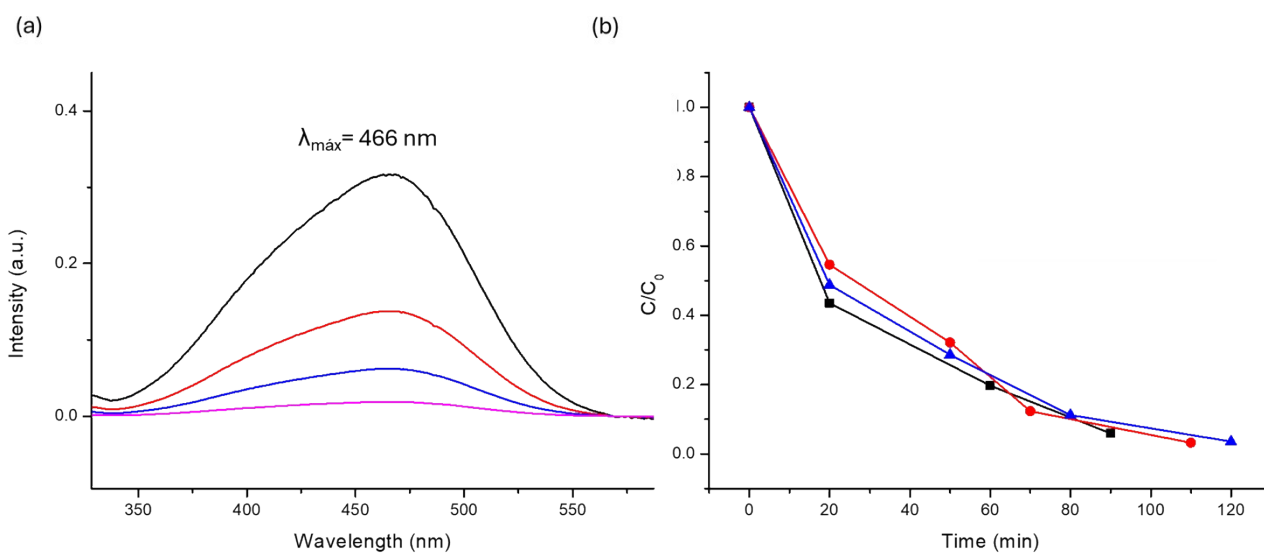

**Figure S37:** Trz dye degradation: a) UV-vis degradation from 0 to 90 min for  $[\text{Cu}_2\text{I}_2(\text{BPEE})]_n$ , and b) plots of Trz absorbance intensity loss as a function of exposure time under photoreactor.  $[\text{Cu}_2\text{I}_2(\text{BPEE})]_n$  (black),  $[\text{Cu}_2\text{Br}_2(\text{BPEE})]_n$  (red), and  $[\text{Cu}_2\text{Cl}_2(\text{BPEE})]_n$  (blue).



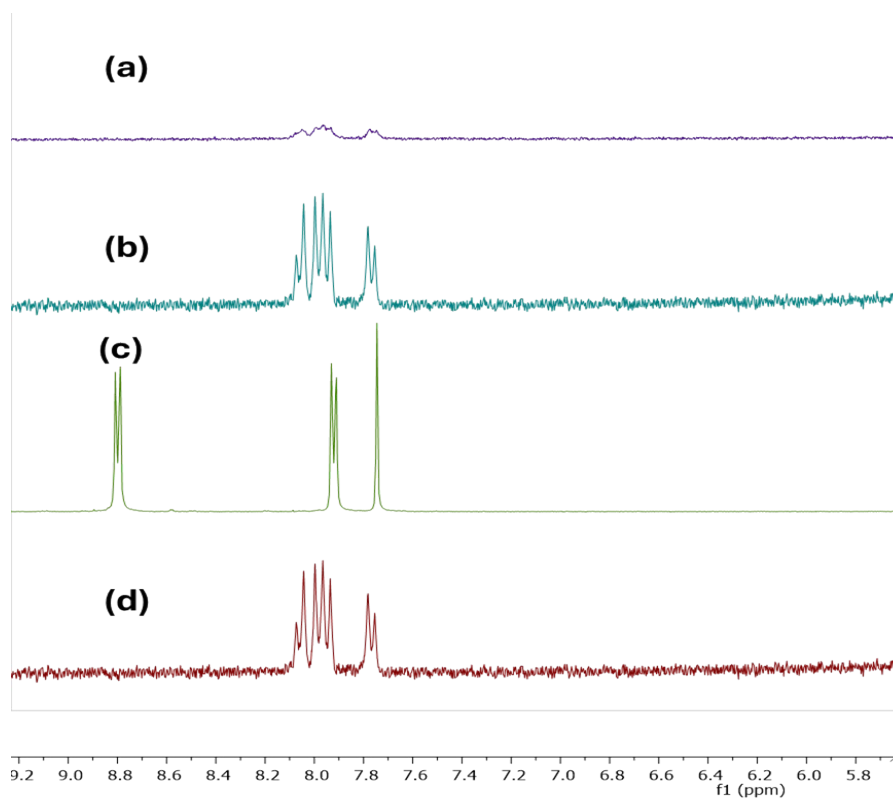

**Figure S38:**  $^1\text{H}$ -NMR study with  $[\text{Cu}_2\text{I}_2(\text{BPEE})]_n$  and Trz  $10^{-3}$  M in  $\text{D}_2\text{O}$ : a) 6b+Trz ( $t_f$ ), b) Trz ( $t_0$ ), c and d) BPEE and Trz, after 60 min in  $\text{D}_2\text{O}$  respectively.

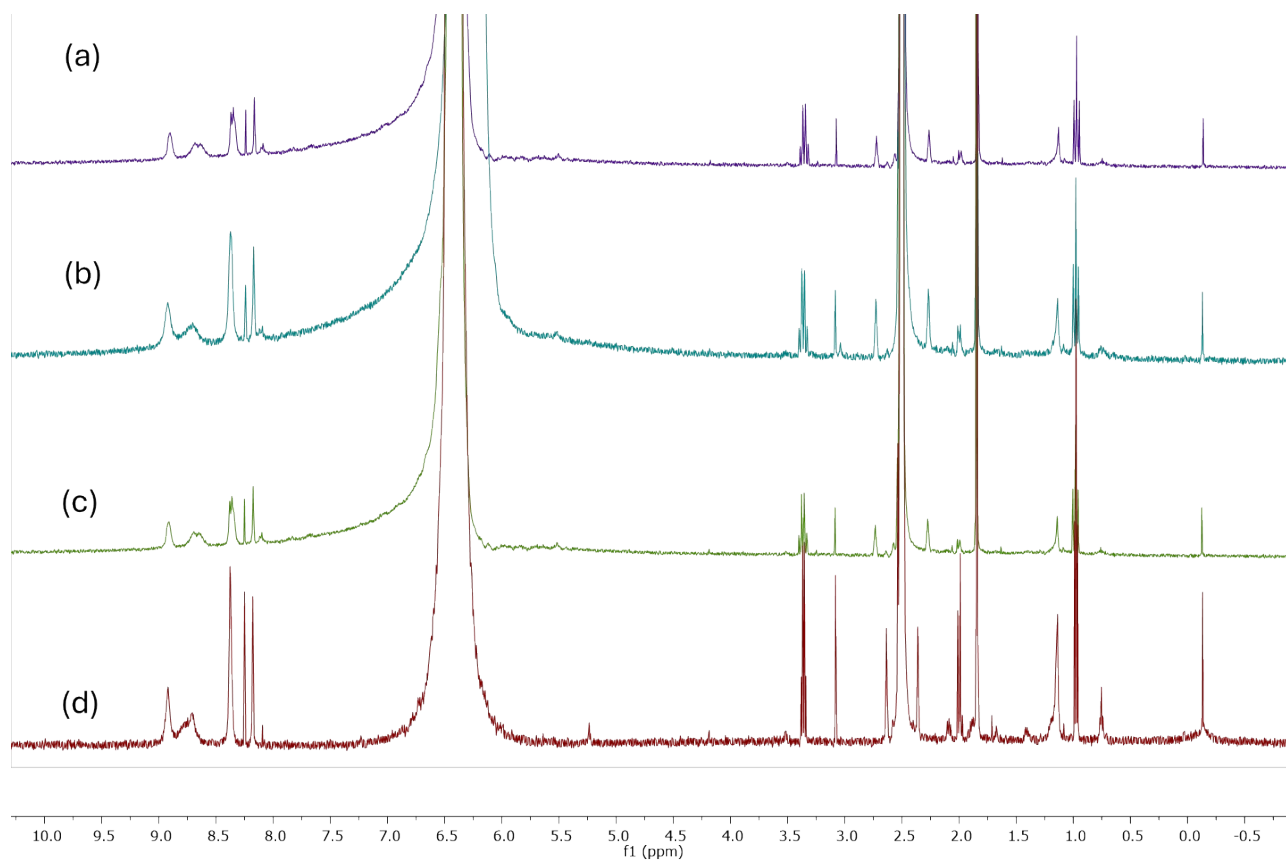

**Figure S39:**  $^1\text{H-NMR}$  study with  $[\text{Cu}_2\text{I}_2(\text{BPPE})]_n$  (**6b**) post degradation of the dyes dissolved in  $\text{DMSO-d}_6$  (+ two drops of  $\text{DCI}$ ). After the degradation of MB (a), Trz (b), and MO (c). Initial  $[\text{Cu}_2\text{I}_2(\text{BPPE})]_n$  dissolved in  $\text{DMSO-d}_6$  (+ two drops of  $\text{DCI}$ ) (d).

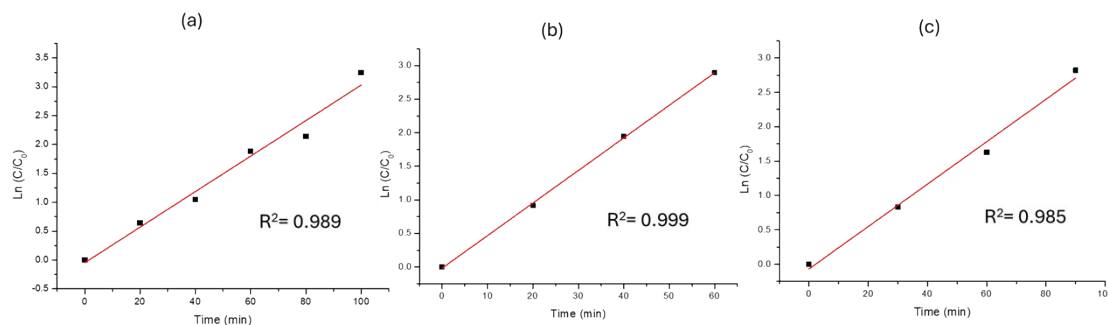

**Figure S40.** Reaction kinetics of compound  $[\text{Cu}_2\text{I}_2(\text{BPPE})]_n$ : order 1 in a) MB, b) MO, and c) Trz.

### 13. Study of the mechanism of photocatalysis via ROS species traps in CPs

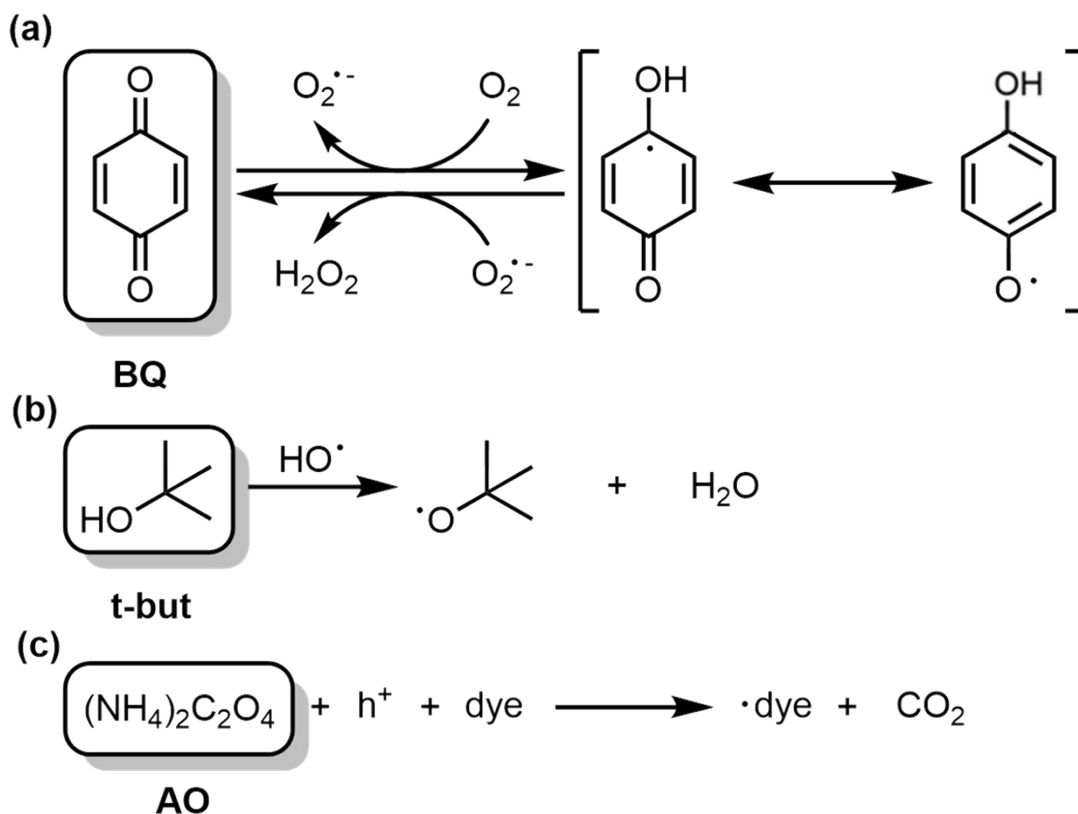

**Figure S41:** Trappers: a) benzoquinone (BQ)  $\cdot\text{OH}$ , tert-butanol (t-but)  $\cdot\text{O}_2^-$  and c) ammonium oxalate (AO) ( $\text{h}^+$ )

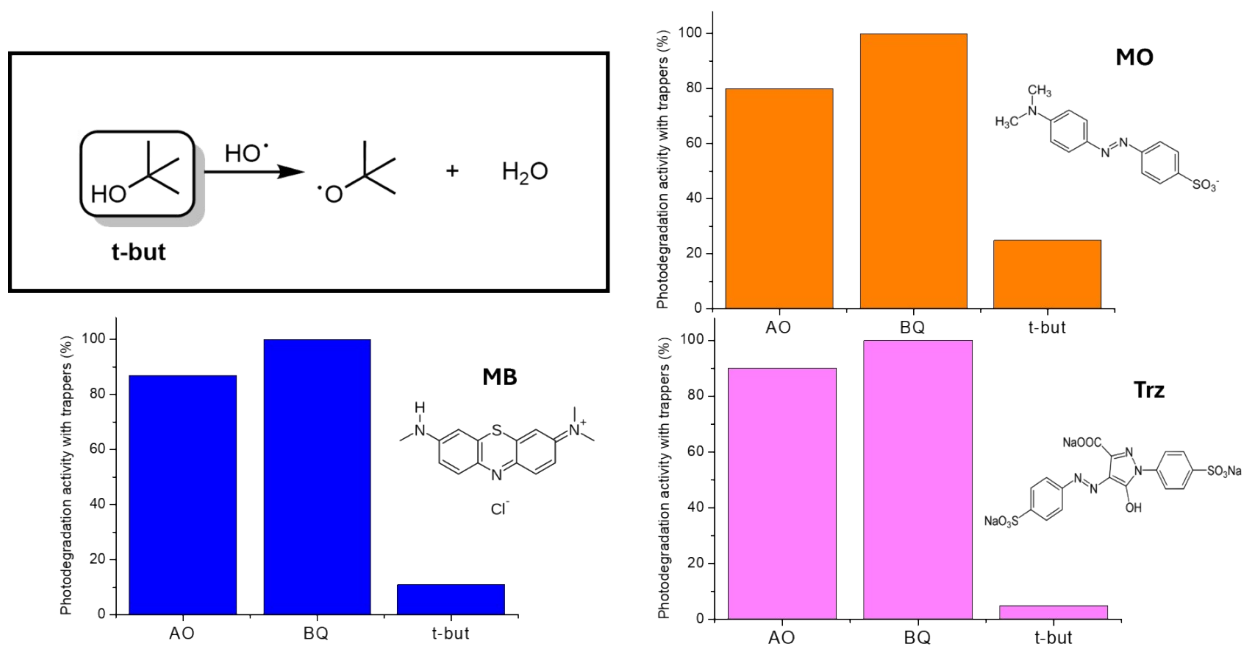

**Figure S42:** Photocatalytic activity of dyes  $10^{-5}\text{M}$  with  $[\text{Cu}_2\text{X}_2(\text{BPEE})]_n$  hole/radical trapper agents after. The degradation of dyes is via radical ( $\cdot\text{OH}$ ).

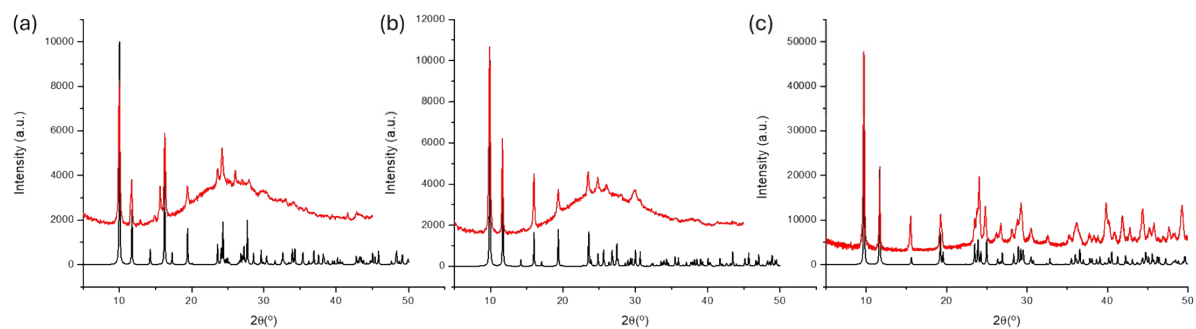

**Figure S43:** P-XRD of compounds (a) **4b**, (b) **5b** and (c) **6b**. P-XRD Simulated (black) and after the maximum number of cycles of dye (MO) degradation (red).
